# Spatial Intra- and Intercellular Alignment of Respiratory Cilia and its Relation to Function

Martin Schneider<sup>1,2</sup>, Sebastian Halm<sup>2</sup>, Adolfo Odriozola<sup>2</sup>, Helga Mogel<sup>3</sup>, Jaroslav Rička<sup>1</sup>, Michael H. Stoffel<sup>3</sup>, Benoît Zuber<sup>2\*</sup>, Martin Frenz<sup>1\*</sup>, Stefan A. Tschanz<sup>2</sup>

<sup>1</sup>Institute of Applied Physics, University of Bern, Sidlerstrasse 5,

<sup>2</sup>Institute of Anatomy, University of Bern, Baltzerstrasse 2,

<sup>3</sup>Division of Veterinary Anatomy, University of Bern, Länggassstrasse 120,  
3012 Bern, Switzerland

\*To whom correspondence should be addressed; E-mail:  
martin.frenz@iap.unibe.ch or benoit.zuber@ana.unibe.ch.

**Ciliary alignment is considered necessary to establish respiratory tract mucociliary clearance, and disorientation is often associated with primary ciliary dyskinesia. Therefore, there is an urgent need for a detailed analysis of ciliary orientation (CO). We used volume electron microscopy to examine CO relative to the tracheal long axis (TLA) by measuring the inter- and intracellular basal body orientation (BBO) and axonemal orientation (AO), which are considered to coincide, both equivalently indicating the effective stroke direction. Our results, however, reveal that only the mean BBO is aligned with the TLA, whereas the AO determines the effective stroke direction as well as the mucociliary transport direction. Furthermore, we show that even if the mean CO is conserved across cell boundaries, a considerable gradient in CO exists within individual cells, which we suspect to be crucial for the emergence of coordinated ciliary activity.**

17 **Our findings provide new quantitative insight into CO and correlate this**  
18 **new structural information with mucociliary function.**

## 19 **Introduction**

20 The epithelium of the tracheobronchial tree constitutes a self-cleaning surface, which mainly  
21 consists of secretory goblet cells and ciliated cells. Dust and infectious particles enter the  
22 respiratory tract when breathing. Due to adhesion, these particles get entrapped by the mucus  
23 layer lining the inner surface of the airways. Coordinated movements of billions of subjacent  
24 cilia then propel the overlying mucous carpet towards the larynx, thereby cleaning the lungs  
25 from inhaled substances.

26 Cilia are hair-like protrusions of the cell membrane with a particular cytoskeletal scaffold  
27 called axoneme. The ciliary axoneme consists of an evolutionary preserved 9+2 microtubular  
28 structure: a central pair is surrounded by nine circularly aligned microtubule doublets. The  
29 microtubules arise from the basal bodies, which are anchored to the cytoskeleton and serve as  
30 nucleation sites for the growth of axonemal microtubules. The chiral structure of the axoneme  
31 as well as of the basal foot appendage allows to unequivocally determine ciliary orientation  
32 (CO).

33 The physical orientational alignment of motile cilia along the proximal-distal axis of the  
34 airways is a prerequisite for concerted directional ciliary movement and the generation of  
35 directed fluid flow (e.g. Vladar et al. (2015); Guirao and Joanny (2007)). Studies attempting to  
36 quantify the orientation of respiratory cilia usually determined the direction of the assumed  
37 ciliary beating plane, or more specifically, the direction of the ‘effective stroke’ (or ‘power  
38 stroke’). According to the literature, the effective stroke direction is unambiguously defined,  
39 and can be inferred from two chiral ciliary structures: 1) the ciliary beating plane is assumed  
40 to be perpendicular to the central pair of microtubules, and in particular, the effective stroke  
41 is assumed to be directed from doublet 1 towards the gap between doublet 5 and 6 Satir and  
42 Christensen (2007); Satir et al. (2014). 2) The direction indicated by the tip of the basal foot  
43 appendage is considered to point into the direction of the effective stroke (e.g. Vladar et al.  
44 (2015); Gibbons (1961); Satir and Dirksen (1985)), which is sometimes also supposed to indicate

45 the direction of fluid flow (e.g. Marshall and Kintner (2008); Chien et al. (2013); Satir and  
46 Dirksen (1985)). Moreover, the ciliary effective stroke direction is commonly considered to  
47 coincide with the direction of fluid flow. Consequently, many authors act on the assumption  
48 of a coincidence between the effective stroke direction inferred from the axonemal orientation,  
49 the effective stroke direction inferred from the basal foot orientation and the direction of fluid  
50 flow.

51 Ciliary disorientation has been proposed and discussed as a variant of primary ciliary dysk-  
52 nesia (PCD) Rutman et al. (1993); Rayner et al. (1996); Rutland and De Iongh (1993); De Iongh  
53 and Rutland (1989). These studies particularly reported on patients showing all the clinical  
54 symptoms of PCD including abnormal or absent mucociliary clearance, while displaying nor-  
55 mal ciliary beat frequency, normal ciliary beat pattern as well as normal ciliary ultrastructure,  
56 but exhibiting a disorganized CO as the only diagnostic finding indicating a disorder. In a more  
57 recent comprehensive study, the secondary nature of ciliary disorientation has been demon-  
58 strated Jorissen and Willems (2004). Therefore, as suggested in Marshall and Kintner (2008),  
59 the most conservative conclusion is that the importance of CO as an ultrastructural defect in  
60 PCD subjects remains to be fully explored. It is widely accepted that diagnosed disorganized  
61 ciliary orientation may either be the cause for mucociliary dysfunction, or a consequence  
62 of mucociliary anomalies. Ultimately, ciliary disorientation seems to be correlated with ab-  
63 normal mucociliary clearance. It has very recently been shown that pathogenic variants in  
64 growth arrest-specific protein 2-like 2 (GAS2L2) lead to a clinical PCD-phenotype exhibiting  
65 normal axoneme structure, but uncoordinated hyperkinetic ciliary activity and impaired CO,  
66 which results in inefficient mucociliary clearance Bustamante-Marin et al. (2019). These re-  
67 cent findings thus underline the relevance of proper CO for efficient mucociliary clearance.  
68 Nevertheless, ciliary disorientation in the absence of other ultrastructural defects is presently  
69 not approved as a criterion for a positive PCD diagnosis, neither by the American Thoracic  
70 Society Shapiro et al. (2018), nor by the European Respiratory Society Lucas et al. (2017).

71 Current research on CO is typically focused on the identification of the governing mecha-  
72 nisms establishing initial polarization cues and guiding the common orientation of cilia during  
73 development Luo et al. (2017); Herawati et al. (2016); Chien et al. (2013); Guirao et al. (2010);  
74 Vladar et al. (2012); Werner et al. (2011); Mitchell et al. (2007). Planar cell polarity (PCP) pro-

75 teins were shown to be asymmetrically localized in various organs and species, prior to the  
76 onset of ciliary beating, and are therefore suspected to establish initial directionality Vldar  
77 et al. (2012); Baumann (2010); Wallingford (2010). Basal bodies were particularly found to be  
78 highly disorganized (in terms of position and/or orientation) when docking at the apical cellu-  
79 lar surface in different ciliated epithelial tissues of various species Spassky and Meunier (2017);  
80 Herawati et al. (2016); Guirao et al. (2010). Generally, it is considered that interactions of the  
81 actin and microtubular cytoskeletal network with PCP components set a polar bias Werner  
82 and Mitchell (2012); Mitchell et al. (2007). The actin and microtubular network is furthermore  
83 considered to connect, reorient and (spatially) realign the basal feet Vldar et al. (2012); Werner  
84 and Mitchell (2012); Werner et al. (2011). The onset of ciliary beating is then thought to refine  
85 CO by a positive feedback mechanism: hydrodynamic forces created by the collectively gener-  
86 ated fluid flow refines the orientation of roughly oriented young cilia in a common direction,  
87 which in turn amplifies fluid flow Guirao et al. (2010); Mitchell et al. (2007).

88 The motivation for the present paper originates from the formulation and analysis of an  
89 oversimplified pluricellular epithelium model Schneiter et al. (2019); Ricka (2010), which repre-  
90 sents an array of locally interacting ciliated cells able to self-organize towards a self-cleaning  
91 virtual epithelium. When ‘constructing’ such a virtual epithelium, modelers need access to  
92 dedicated quantitative morphological information. Despite the available large body of litera-  
93 ture concerning CO during development, the effect of cellular boundaries and of the spatial  
94 ciliary alignment on the orientation of the ciliary beating plane remains poorly character-  
95 ized. Therefore, we conjectured different conceivable geometries, each representing a specific  
96 inter-cellular organization of the ciliary beating plane. Consequently, we were left with an un-  
97 resolved question: does the mean orientation of cilia vary between neighboring cells (possibly  
98 even according to a specific inter-cellular spatial pattern)? Or, is CO consistent beyond cell  
99 boundaries? In order to reach the ultimate goal of the accurate understanding of mucociliary  
100 phenomena, numerical models require access to this kind of dedicated morphological informa-  
101 tion, particularly with respect to the spatial organization of CO. The present work intends to  
102 fill the gap of information regarding the spatial organization of CO and to relate the structural  
103 features of CO to functional behavior such as mucociliary transport.

## 104 Results

### 105 Ciliary Orientation with Respect to the Tracheal Long Axis

106 An overview of all determined angular values for the basal body orientation ( $n = 1661$ ) and the axonemal orientation ( $n = 1998$ ), is provided in Table 1 and Table 2, respectively. The data

Table 1: Overview of the measured basal body orientations ( $\omega$ ). Each cell contains the circular mean and the circular standard deviation (values are listed in  $[\circ]$ ) within the indicated group (rows from top to bottom: overall, per animal, per block sample and per field of view). The found basal body orientations are additionally graphically represented in Table 1 – Figure Supplement 1.

|       |  | Basal Body Orientation $\omega[\circ]$ |                 |                  |                 |                  |                  |                  |                 |
|-------|--|----------------------------------------|-----------------|------------------|-----------------|------------------|------------------|------------------|-----------------|
|       |  | Overall (n=1661)                       |                 |                  |                 |                  |                  |                  |                 |
|       |  | 6.4 $\pm$ 24.9                         |                 |                  |                 |                  |                  |                  |                 |
|       |  | Animal 1 (n=523)                       |                 | Animal 2 (n=591) |                 | Animal 3 (n=395) |                  | Animal 4 (n=152) |                 |
|       |  | 7.1 $\pm$ 21.5                         |                 | 21.4 $\pm$ 22.3  |                 | -12.6 $\pm$ 19.9 |                  | -3.9 $\pm$ 15.9  |                 |
|       |  | CT (n=204)                             | LA (n=319)      | CT (n=231)       | LA (n=360)      | CT (n=219)       | LA (n=176)       | CT (n=68)        | LA (n=84)       |
| Block |  | 9.7 $\pm$ 26.0                         | 5.6 $\pm$ 18.1  | 25.8 $\pm$ 29.9  | 18.8 $\pm$ 15.5 | -5.6 $\pm$ 17.7  | -21.5 $\pm$ 19.0 | -6.9 $\pm$ 14.9  | -1.6 $\pm$ 16.3 |
| FOV1  |  | 11.4 $\pm$ 27.5                        | 13.7 $\pm$ 15.7 | 34.8 $\pm$ 26.5  | 21.9 $\pm$ 13.3 | -4.6 $\pm$ 16.8  | -25.2 $\pm$ 14.6 | 0.0 $\pm$ 12.4   | ND              |
| FOV2  |  | 6.8 $\pm$ 22.8                         | -2.2 $\pm$ 16.7 | 10.3 $\pm$ 28.9  | 15.7 $\pm$ 16.9 | -6.4 $\pm$ 18.4  | -17.5 $\pm$ 22.1 | -12.6 $\pm$ 14.4 | -1.6 $\pm$ 16.3 |

Table 2: Overview of the measured axonemal orientations ( $\Theta$ ). Each cell contains the circular mean and the circular standard deviation (values are listed in  $[\circ]$ ) within the indicated group (rows from top to bottom: overall, per animal, per block sample and per field of view). The found axonemal orientations are additionally graphically represented in Table 2 – Figure Supplement 1.

|       |  | Axonemal Orientation $\Theta[\circ]$ |                 |                  |                 |                  |                |                  |                 |
|-------|--|--------------------------------------|-----------------|------------------|-----------------|------------------|----------------|------------------|-----------------|
|       |  | Overall (n=1998)                     |                 |                  |                 |                  |                |                  |                 |
|       |  | 19.4 $\pm$ 23.2                      |                 |                  |                 |                  |                |                  |                 |
|       |  | Animal 1 (n=386)                     |                 | Animal 2 (n=370) |                 | Animal 3 (n=670) |                | Animal 4 (n=572) |                 |
|       |  | 24.9 $\pm$ 18.0                      |                 | 41.1 $\pm$ 25.9  |                 | 9.6 $\pm$ 21.6   |                | 14.0 $\pm$ 15.5  |                 |
|       |  | CT (n=133)                           | LA (n=253)      | CT (n=127)       | LA (n=243)      | CT (n=407)       | LA (n=263)     | CT (n=255)       | LA (n=317)      |
| Block |  | 25.2 $\pm$ 22.7                      | 24.8 $\pm$ 15.1 | 60.3 $\pm$ 34.1  | 32.7 $\pm$ 13.5 | 11.3 $\pm$ 16.5  | 6.6 $\pm$ 27.6 | 11.1 $\pm$ 15.6  | 16.3 $\pm$ 15.1 |
| FOV1  |  | 29.5 $\pm$ 14.7                      | 29.9 $\pm$ 15.1 | 73.3 $\pm$ 26.7  | 34.0 $\pm$ 11.7 | 13.6 $\pm$ 17.2  | 5.3 $\pm$ 22.7 | 19.9 $\pm$ 10.2  | 14.7 $\pm$ 15.5 |
| FOV2  |  | 17.9 $\pm$ 30.1                      | 20.6 $\pm$ 13.7 | 41.1 $\pm$ 34.5  | 30.8 $\pm$ 15.6 | 9.0 $\pm$ 15.5   | 8.8 $\pm$ 33.7 | 3.0 $\pm$ 15.4   | 17.1 $\pm$ 14.8 |

107 was divided into four groups, which correspond to the four stages of the sample preparation  
 108 (see Fig.1). Consequently, Table 1 and Table 2, which list the values for the circular mean  
 109

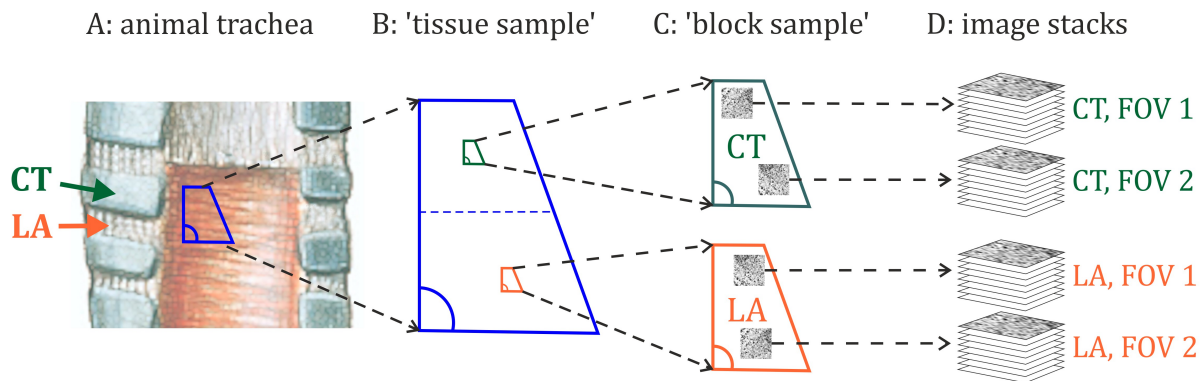

Figure 1: Four procedural substeps (A,B,C,D) of the sample preparation are illustrated. A: one large trapezoidal mucous membrane sample ( $\approx 3\text{cm}\times 2\text{cm}$ ) was excised from each trachea. As indicated, each large trapezoid, which is referred to as the ‘tissue sample’ in the following, comprises epithelial tissue overlying tracheal cartilages (CT) as well as annular ligaments (LA). B: from each large fixed trapezoidal epithelium sample, two smaller ( $\approx 3\text{mm}\times 2\text{mm}$ ) trapezoids were then excised: one being associated with CT-tissue and one with LA-tissue. These smaller trapezoidal samples are referred to as ‘block samples’ in the following. C: after processing the tissue according to the protocol for serial block face scanning electron microscopy, two regions of interest on each of the block samples were imaged. D: consequently, from each trachea four image stacks ( $2\times\text{CT}$ ,  $2\times\text{LA}$ ) were produced. As indicated, each image stack can be regarded as a (three-dimensional) field of view (FOV).

110 and standard deviation within each group, are organized as follows: the values derived from  
 111 the *same field of view*, i.e. from the same image stack, are listed in the bottom row (row 4).  
 112 The distribution of the measured angles  $\omega$  (BBO) and  $\Theta$  (AO) within each field of view are  
 113 additionally illustrated in terms of radial histograms in Table 1 – Figure Supplement 1 and  
 114 Table 2 – Figure Supplement 2, respectively. For the next higher level (row 3), the values  
 115 derived from the *same block*, originating either from CT or LA, were summarized. The angles  
 116 derived from the two blocks, which correspond to the *same animal* were summarized in row  
 117 2. Finally, the top row (row 1) corresponds to the largest group of data, for which all the values  
 118 derived from all four animals ( $\hat{=} 8$  blocks and 16 field of views) were combined.

119 Overall, we found the mean basal body orientation to be  $\langle\omega\rangle_c = 6.4^\circ$  and the mean ax-  
 120 onemal orientation to be  $\langle\Theta\rangle_c = 19.4^\circ$ . It should be noted that these circular mean values  
 121 were derived by equally weighting each cilium. In consideration of the sample preparation,

122 however, one would receive more meaningful estimates  $\langle \overline{\omega} \rangle_c$  and  $\langle \overline{\Theta} \rangle_c$  of the overall mean di-  
 123 rections by weighting the mean values derived from each of the small trapezoidal block sample  
 124 (summarizing therefore two fields of view derived from the same block, which corresponds to  
 125 the third row in Table 1 and Table 2) according to their corresponding standard error (SE). The  
 126 statistical SE of the mean direction determined for each sample block is considerably lower  
 127 than the SE introduced by the practical approach, i.e. by the excision of the larger trapezoidal  
 128 tissue samples and by the positioning of the smaller trapezoids.

129 Denoting the block-wise derived mean values as  $\gamma_1, \dots, \gamma_8$ , the sampling-corrected esti-  
 130 mate and its SE can be calculated according to Eq.8 and Eq.9 (stated in Materials & Methods),  
 131 respectively. The ‘sampling-corrected’ estimate for the mean basal body orientation, and its  
 132 SE, finally amounts to:  $\langle \overline{\omega} \rangle_c = 3.0^\circ \pm 5.0^\circ$ . The ‘sampling-corrected’ estimate for the mean  
 133 axonemal orientation, and its SE, amounts to:  $\langle \overline{\Theta} \rangle_c = 23.3^\circ \pm 5.7^\circ$ .

134 The mean difference between the axonemal and the basal body orientation, which is de-  
 135 noted as  $\langle \Delta \rangle_c = \langle \Theta - \omega \rangle_c$  was estimated as follows. One should note that  $\Delta$  represents a relative  
 136 measure and, thus, is not affected by errors introduced by the preservation of the tracheal long  
 137 axis (TLA). Consequently, each sample block  $i$  delivers a certain value for the relative differ-  
 138 ence between the axonemal orientation and the basal body orientation, which we denote as  
 139  $\Delta_i$ . The associated SE  $\sigma_{\Delta_i}$  was calculated according to:  $\sigma_{\Delta_i} = \sqrt{\sigma_{\Theta_i}^2/n_{\Theta_i} + \sigma_{\omega_i}^2/n_{\omega_i}}$ , where  $n_{\Theta_i}$   
 140 and  $n_{\omega_i}$  denote the number of measurements for the AO and the BBO performed in the sample  
 141 block  $i$ , respectively.  $\sigma_{\Theta_i}$  and  $\sigma_{\omega_i}$  denote the respective standard deviations. As the difference  
 142  $\Delta$  represents an angular observable, i.e. an intermediate angle, each  $\Delta_i$  was transformed into  
 143 the unit vector  $\vec{R}_{\Delta_i}$ , which was subsequently weighted by its inverse SE. The mean difference  
 144  $\langle \Delta \rangle_c$  is finally given by the direction of the weighted mean resultant vector  $\langle \vec{R}_{\Delta} \rangle$ :

$$\langle \vec{R}_{\Delta} \rangle = \left( \sum_i (\sigma_{\Delta_i})^{-1} \right)^{-1} \sum_i (\sigma_{\Delta_i})^{-1} \vec{R}_{\Delta_i}. \quad (1)$$

145 The SE of the mean difference was estimated by the pooled SE. This approach yields the fol-  
 146 lowing estimate for the mean difference between the axonemal and the basal body orientation:  
 147  $\langle \Delta \rangle_c = 19.1^\circ \pm 2.1^\circ$ .

148 In conclusion, we found that the tip of the basal foot and the arrow drawn perpendicular  
 149 to the central pair orientation, encloses an angle of  $\langle \overline{\omega} \rangle_c = 3.0^\circ \pm 5.0^\circ$  and  $\langle \overline{\Theta} \rangle_c = 23.3^\circ \pm 5.7^\circ$

150 with the tracheal long axis pointing towards the larynx, respectively. While the laryngeal-  
151 directed TLA is contained in the  $\sigma$ -confidence interval for the mean BBO, the mean AO differs  
152 with a high significance (at the  $4\sigma$ -level). The difference between the two highly significant  
153 distinct orientational observables amounts to  $\langle \Delta \rangle_c = 19.1^\circ \pm 2.1^\circ$ . It has to be mentioned that  
154 neither the mean AO nor the mean BBO showed a statistically significant difference between  
155 samples collected from above the cartilage rings (CT) and from above the tracheal ligaments  
156 (LA).

## 157 **Characteristic Directions of Mucociliary Function**

158 In order to discuss the meaning of the two structurally derived orientational measures, i.e. the  
159 mean AO and the mean BBO, with respect to mucociliary function, we relate the morpholog-  
160 ical data to functional observables characterizing the oscillations of the mucous surface. The  
161 functional data, presented in the following, was derived from previous experimental work on  
162 bovine trachea explants Burn (2009). As the experimental procedure as well as imaging setup  
163 based on high-speed reflection contrast microscopy was previously described in Ryser et al.  
164 (2007) with additional technical information in Burn (2009), the principles are only briefly  
165 outlined in the Materials & Methods section.

166 Fig.2 summarizes the set of functional parameters derived from 56 measurements and 14  
167 tracheas (1-7 fields of view were captured for one second on each trachea). The top row in  
168 Fig.2 emphasizes that each of the derived transport and wave propagation velocities represent  
169 a vector having a certain magnitude as well as a certain direction. The second row in Fig.2  
170 shows the compilation of the corresponding radial histograms, which neglect the magnitudes  
171 and, therefore, represent the distribution of the transport direction and the wave propagation  
172 direction.

## 173 **Differences in Ciliary Orientation Between Neighboring Cells**

174 In order to uncover whether the mean CO changes between neighboring cells, we examined  
175 changes in CO between cells for which it was possible to determine the orientation of a mini-  
176 mum of 25 cilia (AO- or BBO-values). Moreover, only pairs of cells derived from the same field  
177 of view were compared with each other.



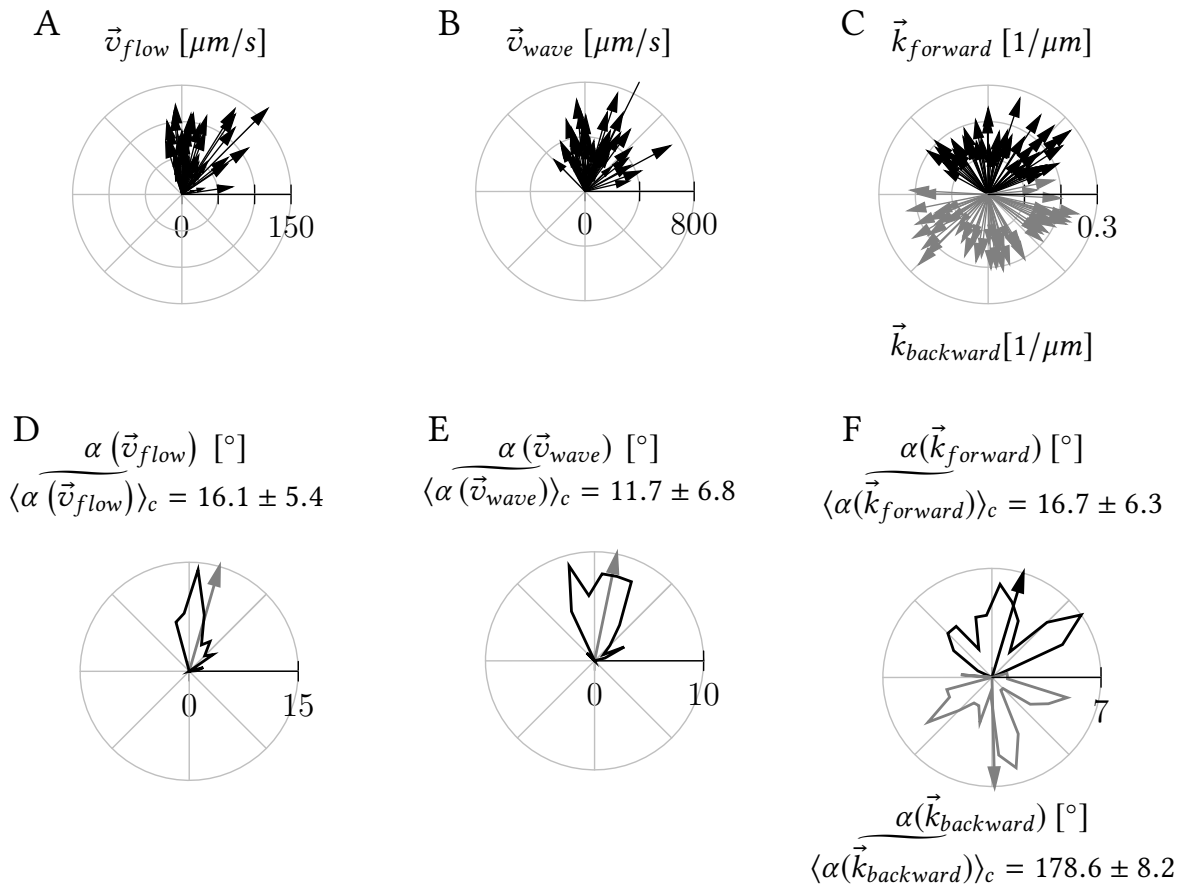

Figure 2: A: mean tracer transport velocities representing the mucociliary flow velocities ( $\vec{v}_{flow}$ ). B: distribution of the propagation velocity of the 'mean wave' ( $\vec{v}_{wave}$ ). C: mean wave vectors representing the 'mean harmonic plane wave' propagating into the pharyngeal direction (black vectors) and the 'mean harmonic plane wave' propagating into the opposite direction (gray vectors). D-F: radial histograms generated by the extraction of the corresponding propagation directions displayed in the first row (A-C). The arrows represent the respective sampling corrected circular mean values.

178 The histogram shown in Fig.3 provides an overview of how much intracellular mean di-  
 179 rections deviate between neighboring cells. In total, the distribution of 35 absolute differences  
 180 between intracellular means as inferred from the AO and 17 absolute differences between in-  
 181 tracellular means as inferred from the BBO is illustrated. It is evident that intracellular mean  
 182 orientations differ only slightly between cells: the median of the absolute difference of the  
 183 AO and the BBO amounts to  $4.9^\circ$ . This value reflects a remarkable highly organized CO on a  
 184 pluricellular level.

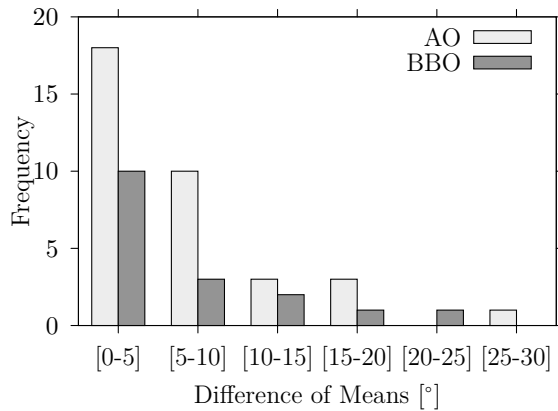

Figure 3: The histogram shows the distribution of the absolute difference between intracellular means in cilia orientation (AO- and BBO inferred values). All values correspond to pairs of cells, which correspond to the same field of view. Only cells with  $n \geq 25$  were considered.

185 In order to test whether pairs of cells share the same mean direction, we calculated Welch's  
186  $t$ -intervals with a significance level of  $\alpha = 1\%$ . The resulting confidence intervals for the dif-  
187 ference between intracellular means are illustrated in Fig.4. These confidence intervals reflect  
188 an estimate, how much the difference between intracellular mean values is expected to vary,  
189 based on the collected data samples and the assumption that the data are random samples  
190 from two populations with a coinciding mean. Confidence intervals not crossing the red line  
191 indicate that the respective differences of intracellular means significantly differ from each  
192 other and, thus, provide the same information as significant  $p$ -values (at  $\alpha = 1\%$ ) derived from  
193 independent two-sample  $t$ -tests with unequal variances.

194 Fig.4 shows that about three-fourths of all confidence intervals cross the red line indi-  
195 cating that the corresponding observed differences between intracellular mean power stroke  
196 directions do not differ significantly.

197 When interpreting the partially significant difference between intracellular means, the fol-  
198 lowing conditions must be taken into account: 1) In a few cells the determined values for  $\omega$   
199 and  $\Theta$  deviate considerably from a normal distribution. Thus, the assumption of intracellular  
200 normally distributed values was not always met. 2) The sample size, i.e. the number of COs  
201 we were able to determine per cell, varied between  $n = 25$  and  $n = 84$ . Highly significant  
202 differences of means correspond to pairs of cells comprising at least one cell, for which only a  
203 low number of COs was available. On the other hand, mean directions corresponding to pairs  
204 of cells with larger sample sizes show almost coinciding mean effective stroke directions, even  
205 though statistical power grows with an increasing sample size. 3) As we will see, the apparent

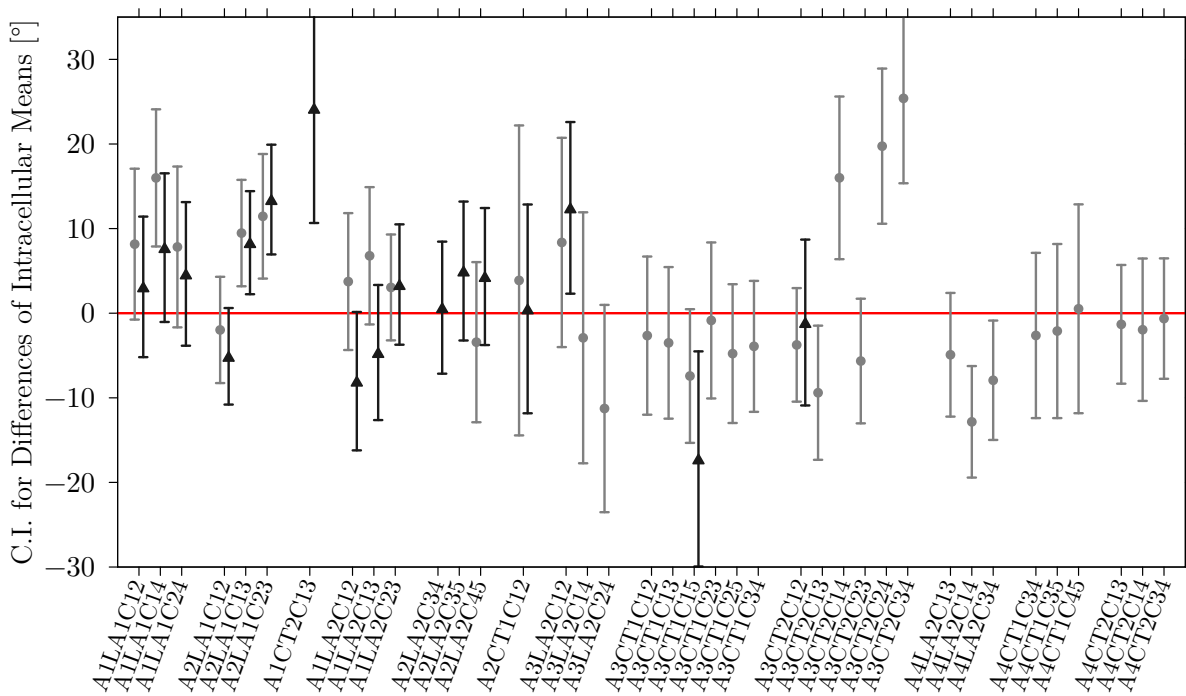

Figure 4: The graph shows 99%-Welch's  $t$ -confidence intervals for the difference between intracellular means. Light gray and dark gray intervals correspond to AO and BBO values, respectively. The dots and triangles indicate the difference between intracellular means in AO and BBO, respectively. The x-tick labels specify which pair of cells are being compared: for instance, the label 'A1LA2C23' denotes the difference of intracellular means between cell 2 and cell 3 ('C23') determined on the second image stack, which was derived from ligamentum annulare ('LA2') from animal 1 ('A1').

206 contradiction from the last point gets resolved by the fact that our sampling was not ran-  
 207 dom (biased representation of the population), which is caused by spatially non-isotropically  
 208 distributed data being subject to spatial correlations.

209 In order to complement the pairwise comparisons between intracellular means, we used  
 210 a global descriptive approach to analyse the impact of cell boundaries on CO. This additional  
 211 approach is based on the comparison of the orientational discrepancy in-between pairs of cilia  
 212 picked from the same cell with the discrepancy in-between pairs of cilia picked from distinct  
 213 cells. Therefore, two sets of angular deviations (in BBO and AO) within each possible pairwise  
 214 combination of cilia were constructed: 1) the set of angular deviations within each possible  
 215 *intracellular* combination of cilia pairs, which are referred to as *IntraBBO* and *IntraAO*, and 2)

216 the set of angular deviations within all possible combinations of intercellularly drawn pairs of  
 217 cilia, which are referred to as *InterBBO* and *InterAO*. The construction of these combinatorial  
 218 sets is formally denoted in Eq.2 and Eq.3,

$$IntraBBO, AO = \left\{ |\alpha_{ij}^{BBO,AO} - \alpha_{kl}^{BBO,AO}| : i = k, j = 1, \dots, N_i, l = 1, \dots, N_k \right\}, \quad (2)$$

$$InterBBO, AO = \left\{ |\alpha_{ij}^{BBO,AO} - \alpha_{kl}^{BBO,AO}| : i \neq k, j = 1, \dots, N_i, l = 1, \dots, N_k \right\}, \quad (3)$$

219 where *BBO, AO* indicates that the sets were constructed with respect to both orientational  
 220 observables. The indices *i* and *k* specify the cell and the indices *j* and *l* iterate over all cilia of cell  
 221 *i* and *k*, respectively. The sets *IntraBBO, IntraAO* and *InterBBO, InterAO* were constructed  
 222 for each field of view separately. The boxplots shown in Fig.5 illustrate the distribution of  
 223 intracellularly and intercellularly drawn pairs of cilia collected over all fields of view ( $> 5 \cdot 10^5$   
 values). The boxplots indicate a slight tendency to larger deviations for pairs of cilia drawn

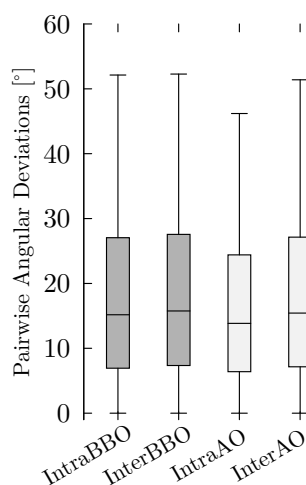

Figure 5: Boxplots illustrating the distribution of angular deviations within pairs of cilia (from the left to the right): drawn from the same cell in terms of the BBO, drawn from different cells in terms of the BBO, drawn from the same cell in terms of AO and as well as from different cells in terms of AO. The whiskers indicate the range covered by 95% of all data, outliers were suppressed.

224  
 225 from distinct cells (for both orientational measures): the median deviation in *IntraBBO* and  
 226 *InterBBO* amounts to  $15.2^\circ$  and  $15.8^\circ$ , respectively, and in *IntraAO* and *InterAO* to  $13.8^\circ$  and  
 227  $15.4^\circ$ , respectively. Considering the bumpy apical cellular surface and that cilia drawn from  
 228 distinct cells are located considerably further apart than cilia drawn from the same cell, the  
 229 overall directional similarity between intra- and intercellular deviations in CO indicates that  
 230 the mean CO does not change between neighboring cells.

## 231 Spatial Correlations in CO

232 In consideration of Tobler's first law of geography Tobler (1970): '*everything is related to every-*  
233 *thing else, but near things are more related than distant things*', we used geostatistical methods  
234 in order to investigate the spatial dependence of our spatially irregularly distributed data.

235

## 236 Radial Variogram

237 In order to measure spatial similarity (or rather dissimilarity in our case) we made use of the so-  
238 called empirical madogram, which is a first order version of the empirical variogram Legendre  
239 and Legendre (1998); Mathur (2015). We used a radial (one-dimensional) version, denoted in  
240 the following as  $\langle |\Delta\alpha| \rangle(r \pm \delta_r)$ , which provides a measure of how much the orientation of two  
241 cilia ( $\alpha_i$  and  $\alpha_j$ ) separated by a certain distance deviate from each other and which is defined  
242 as:

$$\langle |\Delta\alpha| \rangle(r \pm \delta_r) = \frac{1}{N(r \pm \delta_r)} \sum_{i,j \in N(r \pm \delta_r)} |\alpha_i(\vec{r}_i) - \alpha_j(\vec{r}_j)|. \quad (4)$$

243 To put it simply,  $\langle |\Delta\alpha| \rangle(r \pm \delta_r)$  denotes the average angular deviation between pairs of cilia  
244 located at  $\vec{r}_i, \vec{r}_j$ , which fall into a certain distance class  $r' \pm \delta_r$ , i.e.  $r' - \delta_r \leq \|\vec{r}_i - \vec{r}_j\| \leq r' + \delta_r$ .  
245  $N(r \pm \delta_r)$  denotes the number of all pairs of cilia located in respective distance classes. In  
246 practice,  $\langle |\Delta\alpha| \rangle(r \pm \delta_r)$  is constructed as follows: for  $N$  cilia all  $\binom{N}{2}$  possible pairs are built and  
247 subsequently, the associated distances as well as the angular deviations are determined. After  
248 choosing a certain distance class width ( $2\delta$ ), the average angular deviation in each distance  
249 class is calculated. Note that the distance between two cilia located at  $\vec{r}_i = (x_i, y_i, z_i)$  and  
250  $\vec{r}_j = (x_j, y_j, z_j)$ , were calculated such that it approximately represents the 'geodesic distance'  
251 along the curved cellular surface.

## 252 Directional Variogram

253 Besides the variogram version defined in Eq.4, we used a directional version of Eq.4 deliver-  
254 ing two-dimensional variograms, denoted as  $\langle |\Delta\alpha| \rangle(\Delta x \pm \delta_x, \Delta y \pm \delta_y)$ , which was calculated  
255 according to:

$$\langle |\Delta\alpha| \rangle (\Delta x \pm \delta_x, \Delta y \pm \delta_y) = \frac{1}{N(\Delta x \pm \delta_x, \Delta y \pm \delta_y)} \sum_{i,j \in N(\Delta x \pm \delta_x, \Delta y \pm \delta_y)} |\alpha_i(\vec{r}_i) - \alpha_j(\vec{r}_j)| . \quad (5)$$

256 The directional, or two-dimensional, variogram was applied in its unsigned version (accord-  
 257 ing to the formulation in Eq.5), as well as in its signed version, i.e.  $\langle \Delta\alpha \rangle_c (\Delta x \pm \delta_x, \Delta y \pm \delta_y)$ .  
 258 The horizontal and vertical distances between two cilia located at  $\vec{r}_i$  and  $\vec{r}_j$ , i.e.  $\Delta x_{ij}$  and  $\Delta y_{ij}$ ,  
 259 were determined after geodesically projecting the coordinates of the respective cilia. In simple  
 260 terms, the three-dimensional curved cellular surface was flattened by an approximate geodesic  
 261 mapping on a two-dimensional plane. Subsequently, the spacing between the projected coor-  
 262 dinates, denoted by  $\Delta x$  and  $\Delta y$ , were determined.

### 263 Direction of Intracellular Gradients in Cilia Orientation

264 In order to determine the direction of clockwise deflection between two cilia located at  $\vec{r}_i$  and  
 265  $\vec{r}_j$ , respectively, we introduced the angle  $\beta$ , which is defined as:

$$\beta = \arctan2(\text{sgn}(\langle \Delta\alpha \rangle_c) \cdot (\Delta y, \Delta x)) . \quad (6)$$

266 In Eq.6,  $\text{sgn}(x)$  denotes the sign function.  $\Delta\alpha$  represents the angular difference between cilium  
 267  $i$  and cilium  $j$ :  $\Delta\alpha = \alpha_i(\vec{r}_i) - \alpha_j(\vec{r}_j)$ . Finally,  $\Delta y$  and  $\Delta x$  are given by the projection of the relative  
 268 distance vector  $(\vec{r}_i - \vec{r}_j)$  on the  $y$ - and  $x$ -axis, respectively.

269 A set of  $N$  spatially distributed cilia provides  $\binom{N}{2}$  pairs of cilia, for which the directions  
 270 of clockwise angular deviations were determined. The circular average over these directions  
 271 yields the mean direction of clockwise deflections in cilia orientation, which is denoted by  
 272  $\langle \beta \rangle_c$ .

### 273 Intracellular Gradual Shift in Cilia Orientation

274 The variograms introduced in Eq.4 and Eq.5 are based on pairwise comparisons of CO with  
 275 respect to the relative spatial positions of cilia. The introduced empirical variograms can be  
 276 constructed from all possible pairs of cilia for which: 1) both cilia  $i$  and  $j$  are drawn from the  
 277 same field of view (FOV), 2) both cilia  $i$  and  $j$  are drawn from the same cell, and 3) cilium  $i$   
 278 and cilium  $j$  are drawn from distinct neighboring cells. Thus, for each field of view (FOV),  
 279 we generated 1) intra-FOV variograms, 2) intracellular variograms, as well as 3) intercellular  
 280 variograms.

281 The various kinds of variograms, which were examined for all fields of view, are exem-  
282 plarily illustrated in Fig.6A-C for axonemally derived orientations from sample ‘A4LA2’. A  
283 collection of additional representative variograms is provided in Figure 6 – Figure Supplement  
284 1. The shape of the generated *radial variograms* revealed the following ubiquitous regularities  
285 across different samples:

286 1. *Orientational deviations increase with interciliary distances*: as shown in Fig.6A, the intra-  
287 cellular radial variogram (solid gray line) displays an increase of the orientational discrepancy  
288 among pairs of cilia from  $10^\circ$  to  $25^\circ$  with increasing relative distance. This means that closely  
289 aligned pairs of cilia are more similarly oriented than further distanced pairs. The pairwise  
290 angular deviation generally increased with an increasing interciliary distance. At interciliary  
291 distances above  $4\text{-}6\mu\text{m}$  a typical increase of  $10\text{-}15^\circ$  was observed.

292 2. *Intercellular (radial) variograms display no distinct behavior*: the dashed black curve in  
293 Fig.6A represents a typical intercellular radial variogram. Overall, the intercellular radial vari-  
294 ograms indicate no intercellular spatial dependency in CO, as they display only little variation  
295 with no noticeable patterns.

296 3. *Cilia orientation de-correlates at interciliary distances of  $4\text{-}6\mu\text{m}$* : the FOV-variograms  
297 (solid black line in Fig.6A) consistently show an initial increase, which is dominated by in-  
298 tracellular cilia pairs, with the interciliary distance and a correlation length of  $\approx 4\text{-}6\mu\text{m}$ . At  
299 distances beyond the correlation length, the variogram is guided by the intercellular vari-  
300 ogram.

301 4. *Maximum orientational discrepancy was found within cells*: It should be pointed out that  
302 intracellular cilia pairs separated by more than  $4\mu\text{m}$  are considerably less similarly oriented  
303 than intercellular cilia pairs, which represents an unexpected finding.

304 The two-dimensional variograms provide directional information of pairwise orientational  
305 deviations. In general, the generated FOV-wide two-dimensional variograms did not show  
306 any distinct patterns across the available fields of view. Sample A4LA2 however suggests  
307 a ‘morphological wave-like pattern’ (see Fig.6B). Unfortunately, the available data sets can  
308 neither prove nor disprove such a pluricellular pattern. This would require to examine larger  
309 fields of view providing spatially isotropically distributed data.

310 As can be seen in Fig.6C, the signed intracellular variograms show evidence of an intra-

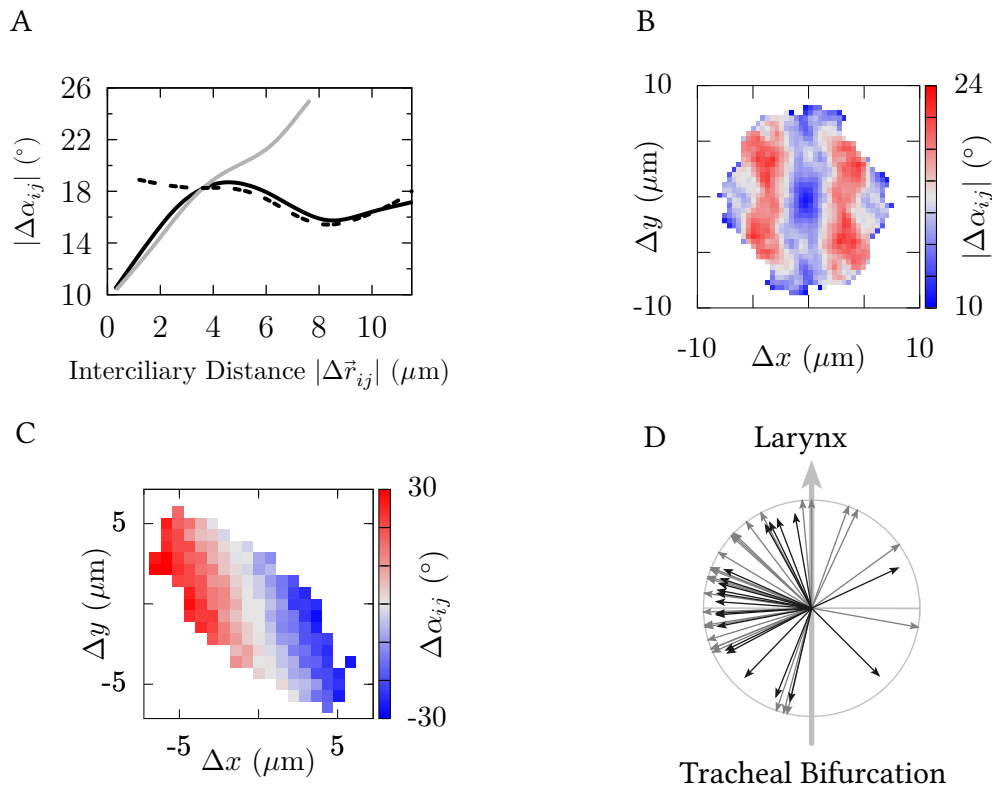

Figure 6: The panels A-C show the radial and directional variograms generated with the AO data derived from sample 'A4LA2'. A: radial variograms (intra-FOV: solid black, intracellular: solid gray, intercellular: dashed black). B: absolute directional FOV-variogram. C: signed directional intracellular variogram. D: The arrows display the distribution of intracellular mean directions towards clockwise deflections in cilia orientation, i.e.  $\langle\beta\rangle_c$ . Gray arrows correspond to AO-derived directions (28 cells) and black arrows to BBO-derived directions (18 cells).

311 cellular gradient in cilia orientation: CO gradually shifts in clockwise direction from the right  
 312 to the left perpendicularly to the TLA (view on the epithelium of the ventral tracheal wall).

313 In order to prove that the alleged intracellular orientational gradient can not be caused by  
 314 outliers, we used Moran's I, which can be transformed to z-scores (e.g. Mathur (2015); Legendre  
 315 and Legendre (1998)), to statistically test whether the direction in which the orientation  
 316 of adjacent cilia (nearest neighbor) deviates in a random manner or not. The application of  
 317 Moran's I on signed intracellular directional variograms, i.e.  $\langle\Delta\alpha\rangle_c(\Delta x, \Delta y)$ , delivered highly  
 318 significant p-values. This confirms an intracellular gradual shift in cilia orientation, which we  
 319 found ubiquitously in all the cells.



320 In approximately 90% of cells, for which we were able to measure at least 30 values for the  
321 AO or the BBO, cilia orientation gradually shifted in a clockwise direction when seen from the  
322 right to the left perpendicularly to the TLA, as shown in Fig.6D.

## 323 Discussion and Conclusions

324 The use of a scanning electron microscope equipped with a 3view module allowed the two-fold  
325 measurement of the CO in terms of the axonemal orientation (AO), which was unambiguously  
326 derived from the central pair orientation (Fig.7), and in terms of the basal body orientation  
327 (BBO), which was determined by the direction indicated by the tip of the basal foot (Fig.8).  
328 The AO, as well as the BBO, were measured under preservation of the laryngeal direction  
329 along the tracheal long axis (TLA) and, in particular, the information of the cellular affiliation  
330 of each cilium.

331 We found that the tips of the basal feet point, in average, towards  $3^\circ \pm 5^\circ$ , when  $0^\circ$  indicates  
332 the TLA pointing in laryngeal direction. Positive values indicate a clockwise-directed devia-  
333 tion (note that the tracheal tissue samples were derived from epithelial surfaces of the ventral  
334 part of the trachea). The average AO was found to be deflected in clockwise direction from  
335 the TLA by  $23^\circ \pm 6^\circ$ . The average difference between the AO and the BBO was determined to  
336 be  $19^\circ \pm 2^\circ$ . The fact that the direction indicated by the basal foot does not coincide with the  
337 axonemal orientation clearly disproves the so far commonly accepted presumption that the  
338 effective stroke direction can equivalently be inferred from the ciliary ultrastructure by either  
339 the AO, or the BBO.

340 In order to reinterpret the meaning of these two structurally derived angular observables  
341 for mucociliary function, we related them to functional observables, i.e. to the mucociliary  
342 transport direction and to the wave propagation direction, which were previously determined  
343 on bovine trachea explants by using reflection contrast microscopy Burn (2009). The mi-  
344 croscopy setup as well as the applied image processing methods were previously described  
345 in Ryser et al. (2007) and subsequently employed in Schätz et al. (2013); Wyss et al. (2018). Re-  
346 lating the structural orientations AO and BBO to the three characteristic functional directions:  
347 1) the sampling-corrected circular mean mucociliary transport direction of  $16.1^\circ \pm 5.4^\circ$ , 2) the

348 sampling-corrected circular mean direction of the mean of harmonic plane waves propagating  
349 into the laryngeal direction, which was found to be  $16.7^\circ \pm 6.3^\circ$ , and 3) the sampling-corrected  
350 circular mean propagation direction of the mean wave of  $11.7^\circ \pm 6.8^\circ$  it becomes evident that  
351 only the AO indicates the effective stroke direction, which is in line with the mucociliary  
352 transport and the direction of the harmonic mean plane wave propagation into the laryngeal  
353 direction.

354 The interpretation of the direction of the harmonic plane wave propagating into the la-  
355 ryngeal direction is however highly complex, as the mucociliary wave field exhibits its pe-  
356 culiarities. It must be pointed out that we did not directly measure the direction of the cil-  
357 iary effective stroke, neither structurally nor functionally. But, in consideration of the notice-  
358 able agreement between the propagation direction of the proportion of harmonic plane waves  
359 propagating towards the larynx, the mucociliary transport direction and the axonemal orien-  
360 tation, it is highly probable that the axonemal orientation indeed corresponds to the effective  
361 stroke direction, which consequently coincides with the transport direction. In order to reach  
362 a definitive statement about the accuracy of the coincidence between the axonemal orienta-  
363 tion and the effective stroke direction, future functional studies might extract the direction of  
364 the effective stroke from, for instance, the optical flow Quinn et al. (2015) in recordings taken  
365 by reflection contrast microscopy.

366 The difference found between the orientation of the basal foot (BBO) and the mucociliary  
367 transport direction of  $16.1^\circ \pm 5.4^\circ$  makes it very unlikely that the basal foot indicates the direc-  
368 tion of transport. This however raises new questions about the orientation of the basal foot:  
369 why is it almost perfectly aligned with the TLA? If it is brought about by the external flow,  
370 why did we find a considerable disagreement with the transport direction? It is conceivable  
371 that the basal foot appendage is structurally related, in a fixed manner, with the axonemal  
372 orientation. On the other hand, the beating pattern of individual cilia are generally thought  
373 to result from interactions with the environmental fluid. Therefore, the angular deviation be-  
374 tween the AO and the BBO could be related in an adaptive manner, as the AO might result from  
375 hydrodynamic interactions, and thus, represent an indicator of the prevailing rheology. In a  
376 similar morphofunctional study performed on the ciliated epithelium of the bovine oviduct  
377 Schätz et al. (2013), we have recently shown that the AO is exactly aligned along the longitu-

378 dinal axis of the fallopian tube. Furthermore, compared to the mucociliary epithelial surface  
379 of the airways, altered rheological conditions are found in the fallopian tube. It specifically  
380 lacks of an air-liquid interface and ciliated cells are submerged in a rather aqueous fluid. Fu-  
381 ture simultaneous measurements of the ciliary AO and the ciliary BBO in the fallopian tube,  
382 might therefore bring clarity to the relation between the alignment of the two ultrastructural  
383 features. We suspect that the BBO either amounts to roughly  $-20^\circ$  (fixed AO-BBO relation),  
384 or points into the same direction as the AO, meaning that the AO adaptively results from the  
385 prevailing fluid mechanical interactions.

386 It is known that the basal foot interacts with the apical cytoskeleton (e.g. Vladar and Axel-  
387 rod (2008); Herawati et al. (2016); Tateishi et al. (2017); Mirvis et al. (2018)). In Herawati et al.  
388 (2016), it was specifically shown that the orientation of the basal foot is correlated with the  
389 positioning process of cilia. Furthermore, the basal body alignment was found to be disrupted  
390 in basal foot depleted (*Odf2*) mutant mice, and as the basal body alignment was found to be  
391 correlated with its orientation, it is probable that the interaction of the basal foot with the  
392 cytoskeletal network is crucial for the positioning and orienting process of cilia.

393 One of our primary aim was to assess whether the mean CO varies between neighboring  
394 cells. We reported the median absolute intercellular difference in CO, which amounts to  $5^\circ$  for  
395 AO- as well as BBO-inferred values. In order to provide further information on how intercellu-  
396 lar orientational deviations relate to intracellular deviations, pairs of cilia having an identical  
397 cellular affiliation were compared to cilia pairs having distinct cellular affiliations. This yielded  
398 almost identical values for the overall median angular deviations within pairs drawn from the  
399 same cell and pairs drawn from distinct cells: for BBO-inferred values the deviation between  
400 medians amounts to  $0.6^\circ$  and  $1.6^\circ$  for AO-inferred values. Moreover, we determined 99%-  
401 confidence intervals for the difference between intracellular means of neighboring cells. The  
402 difference between intracellular means was not significant ( $\alpha = 1\%$ ) for three-fourths of all  
403 pairs of cells.

404 We used spatial analysis methods in order to detect possible spatial regularities in CO. In  
405 particular, extensive usage of a first-order version of the variogram, the so-called madogram,  
406 revealed an intracellular gradual shift in CO. In approximately 90% of all the cells, this ubiqui-  
407 tous intracellular orientational gradient indicated an angular shift in clockwise direction when

408 seen from the right to the left transversely to the TLA.

409 The emergence of collective ciliary beat patterns has recently been studied in terms of nu-  
410 merical models representing hydrodynamically interacting cilia arrays (e.g. Elgeti and Gomp-  
411 per (2013); Niedermayer et al. (2008); Guirao and Joanny (2007); Ghorbani and Najafi (2017)).  
412 These studies typically investigate the effect of geometrical parameters, such as the orienta-  
413 tion and the spatial alignment of cilia. An intracellular gradient in CO is expected to strongly  
414 affect the emergence as well as the robustness of collective ciliary beating patterns and trigger  
415 metachronal waves. It is important to note that the intracellular orientational gradient might,  
416 itself, be the result, as well as the cause, of self-organizing processes during development.

417 Recently, the alignment process of cilia during cell differentiation of cultured multiciliated  
418 murine tracheal cells was studied Herawati et al. (2016). A long-term live-imaging system  
419 was used in order to track the position and orientation of green fluorescent protein-centrin2-  
420 labeled basal bodies during the differentiation process of ciliated cells. It has been shown  
421 that the alignment process undergoes four phases, which have been identified in terms of  
422 four stereotypical basal body alignments. Relevant here is that the refinement process of the  
423 positions of cilia was correlated with the orientation of basal bodies. As the spatial alignment  
424 of cilia, therefore, seems to be interrelated with their orientation, future studies might consider  
425 the role of intracellular orientational gradients for ciliary alignment, and vice versa.

426 The mechanism establishing the herein reported gradual shift in cilia orientation within  
427 cells remains to be discovered. We suspect a tight relation to planar cell polarity (PCP) pro-  
428 teins, whose asymmetrical localization has recently been demonstrated Vladar et al. (2012);  
429 Guirao et al. (2010), as well as to interactions between PCP components and the actin- and mi-  
430 crotubular cytoskeletal network of the apical cellular membrane Spassky and Meunier (2017);  
431 Vladar et al. (2012); Werner and Mitchell (2012); Werner et al. (2011); Mitchell et al. (2007).

432 In summary, this study connects structural and functional observables and reveals that  
433 out of the axonemal and the basal body directions only the AO points in the direction of the  
434 mucociliary transport which corresponds to the direction of the effective stroke. On the other  
435 hand, the BBO was found to be almost parallel to the tracheal long axis. Considering the  
436 orientation of the cilia on a single cell, a gradual shift was found, whereas the cilia orientation  
437 does not change between neighboring cells. The present study interrelates ultrastructural

438 features of individual cilia and their multiscale spatial alignment to mucociliary function and,  
439 thus, bridges the gap between ciliary morphology and function, which sheds new light on the  
440 mechanisms governing the spatial organization of ciliary activity.

## 441 **Materials & Methods**

### 442 **Sample Preparation**

443 This study was performed with tracheal epithelia collected from four freshly slaughtered,  
444 healthy adult cows. Immediately after slaughtering, the trachea was dissected free, opened lon-  
445 gitudinally and rinsed with isotonic phosphate buffered saline (PBS). In order to preserve the  
446 information of the tissue orientation (i.e. the longitudinal axis of the trachea), large asymmet-  
447 ric trapezoidal epithelium samples ( $\approx 3\text{cm}\times 2\text{cm}$ ) were excised from the tracheal wall (Fig.1).  
448 Subsequently, the tissue samples were immediately fixed with 2.5% glutaraldehyde (Agar Sci-  
449 entific, Stansted, Essex, UK) in 0.1M cacodylate buffer (Merck, Darmstadt, Germany), pH 7.4.

450 For serial block face scanning electron microscopy, two small trapezoidal samples ( $\approx 3\text{mm}$   
451  $\times 2\text{mm}$ ), were carefully excised from one large trapezoid: one derived from a region overly-  
452 ing a cartilage ring (cartilago trachealis  $\hat{=}$  CT) and one associated with the adjacent annular  
453 ligament (ligamentum anulare  $\hat{=}$  LA), as illustrated in Fig.1. The tissue samples were pro-  
454 cessed according to a specific protocol for serial block face scanning electron microscopy:  
455 first, the tissue was rinsed four times with 0,15M Na-cacodylate. The last rinse was sup-  
456 plemented with 0.5% Triton x-100 (Octoxinol 9 ( $\text{C}_{14}\text{H}_{22}\text{O}(\text{C}_2\text{H}_4\text{O})_n$ , Sigma-Aldrich, Buchs,  
457 Switzerland), a surfactant allowing for a better permeability of contrast agent into cilia. Af-  
458 ter another wash with 0,15M Na-cacodylate, the staining agents 2%  $\text{OsO}_4$  (Osmiumtetraoxid,  
459 Electron Microscopy Sciences, Hatfield, PA, USA) and 3% potassium ferrocyanide ( $\text{C}_6\text{N}_6\text{FeK}_4$ ,  
460 Sigma-Aldrich, Buchs, Switzerland) in 0.15M Na-cacodylate were added. The tissue was then  
461 rinsed with bidistilled water, and pyrogallol ( $\text{C}_6\text{H}_6\text{O}_3$ , Sigma-Aldrich, Buchs, Switzerland) was  
462 added to enhance the staining of the membrane. Thereafter, samples were successively incu-  
463 bated in 2%  $\text{OsO}_4$ , 1% uranyl acetate (Sigma-Aldrich, Buchs, Switzerland) and Waltonfis lead  
464 aspartate (Sigma-Aldrich, Buchs, Switzerland) Walton (1979). Between each of the latter steps,  
465 the tissue was rinsed with bidistilled water. After this, the tissue was dehydrated through an

466 ascending ethanol series (20%, 50%, 70%, 90%, and twice 100%). The tissue was infiltrated with  
467 Durcupan (epoxy resin, Sigma-Aldrich, Buchs, Switzerland) with decreasing concentrations of  
468 ethanol (1:3, 1:1, 3:1, pure Durcupan). The resin was polymerized for 48 hours at 60°C.

## 469 **Image Acquisition & Analysis**

470 Care was taken in positioning the samples to ensure that the image vertical axis corresponded  
471 to the tracheal long axis (TLA), with the laryngeal end directed towards the image top. Three-  
472 dimensional (3D) ultrastructural images were produced on a Quanta FEG 250 scanning elec-  
473 tron microscope (FEI, Eindhoven, The Netherlands) equipped with a 3View2XP serial block  
474 face module (Gatan, Munich, Germany) using the Digital Micrograph program (Gatan). In  
475 order to achieve an approximately orthogonal sectioning of the cilia, the cutting plane was  
476 chosen with great care in the 3view system and was oriented tangentially to the curved cellu-  
477 lar surface. Block face sectioning was done from the tips of cilia towards their rootlets with a  
478 step size of 120nm (covering a vertical distance of  $\approx 12\mu\text{m}$ ). The surface of the sample blocks  
479 was imaged by back-scattered electron detection. Each image represents a field of view (FOV)  
480 with an area of  $12 \times 12 \mu\text{m}^2$ , which was imaged with a resolution of  $8192 \times 8192$  pixels<sup>2</sup>.

481 Thus, we obtained 16 stacks of images. Each stack was derived from a sample block volume  
482 of  $12 \times 12 \times 12 \mu\text{m}^3$  comprising about 100 sequential serial sections or  $\approx 8192 \times 8192 \times 100$   
483 voxels corresponding to a voxel size of  $1.5 \times 1.5 \times 120 \text{ nm}^3$ . The image sequences were pro-  
484 cessed with the IMOD software package Kremer et al. (1996). CO measurements were done in  
485 3dmod software (image display and modeling program of IMOD), after relative alignment and  
486 denoising by nonlinear anisotropic diffusion Frangakis and Hegerl (2001).

## 487 **Determining Ciliary Orientation**

488 We used two angular observables to quantify the orientation of cilia with respect to the TLA:  
489 1) the direction of the axonemal orientation (AO) Satir and Christensen (2007); Schätz et al.  
490 (2013); Satir et al. (2014); Satir (2016) and 2) the direction of the basal body orientation (BBO)  
491 (e.g. Satir (2016)), both considered to determine the direction of the effective stroke.

492 **Axonemal Orientation (AO)**

493 The ciliary beating plane is commonly assumed to be orthogonal to the line connecting the  
494 central microtubule pair. The ciliary effective stroke is then assumed to point from the micro-  
tubular doublet 1 towards the gap between the microtubular doublets 5 and 6 (Fig.7A). This

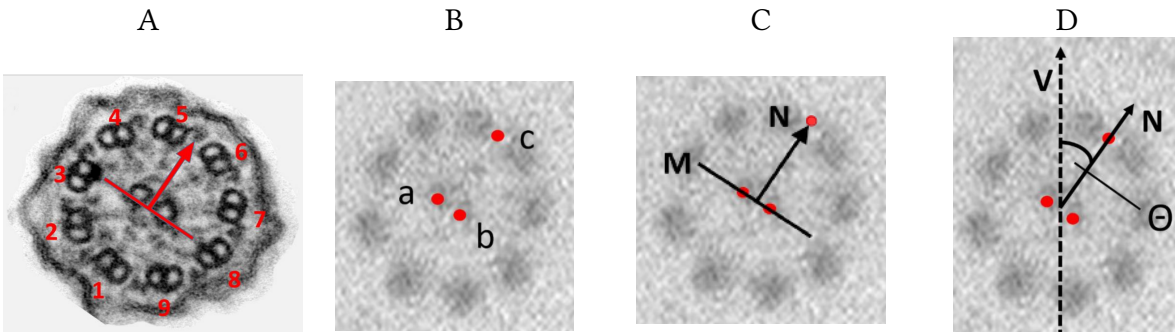

Figure 7: The panels A-D illustrate the measuring of the axonemal orientation. A: Transmission electron micrograph illustrating the assumed ciliary effective stroke direction being perpendicular to the line connecting the central pair and pointing from peripheral doublet 1 towards the gap between peripheral doublets 5 and 6. B: three points a,b and c labelling the coordinates of the central pair and the gap between peripheral doublets 5 and 6, respectively. C: line M connects the two central microtubules. The axonemal orientation is then indicated by the arrow N. D: Finally,  $\Theta$  represents an unambiguous observable for the axonemal orientation with respect to the TLA, which coincides with the dashed vertical arrow V pointing towards the larynx.

495  
496 direction with respect to the tracheal long axis was determined from three coordinates: two  
497 labelling the central microtubule pair (point 'a' and 'b' in Fig.7B) and a third labelling the gap  
498 between the microtubule doublets 5 and 6 (point 'c' in Fig.7B). Finally, the axonemal ori-  
499 entation (AO) with respect to the TLA was defined as the angle ' $\Theta$ ', which is enclosed by the  
500 arrow 'N' and the vertical arrow 'V' being parallel to the TLA and pointing towards the larynx  
501 (Fig.7D).

502 We found a considerable axonemal twist along the ciliary long axis (as illustrated in Fig-  
503 ure 7 – Figure Supplement 1). Its effect on our orientational measurements was minimized  
504 by pursuing each single cilium along its longitudinal axis (z-axis), in order to determine the  
505 axonemal as well as the basal body orientation as close as possible to the apical cell surface.

506 **Basal Body Orientation (BBO)**

507 Due to the lack of a quantitative study proving the equivalence of the two orientational ob-  
508 servables, we decided to measure the orientation of each cilium two-fold (whenever possible),  
509 by means of the AO as well as the BBO. The orientation of the basal foot with respect to the  
510 TLA was determined from two coordinates: the first indicating the center of the basal body  
511 and the second indicating the tip of the basal foot appendage. As illustrated in Fig.8, the angle  
512  $\omega$ , which is enclosed by the arrow 'P' (pointing from the center of the basal body towards the  
513 tip of the basal foot) and the vertical arrow 'V', represents an unambiguous observable for the  
514 basal body orientation.

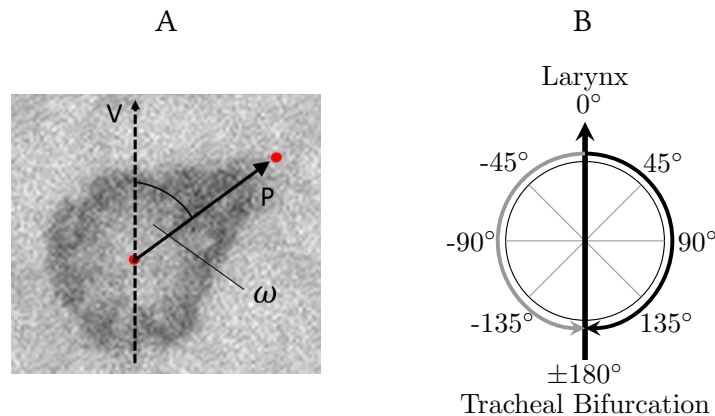

Figure 8: A: The basal body orientation was unambiguously defined by the basal foot orientation, which was measured by the angular observable  $\omega$  enclosed by the arrow 'P' and the dashed arrow 'V'. The arrow 'P' points from the center of the basal body to the tip of the basal foot and the dashed arrow 'V' coincides with the long axis of the trachea and points into laryngeal direction. B: the axonemal orientation as well as the basal body orientation were measured in terms of the angular deviation from the tracheal long axis pointing into laryngeal direction (vertical arrow).

515 Finally, the axonemal orientation ( $\Theta$ ) as well as the basal body orientation ( $\omega$ ) was reported  
516 in terms of the angular deviation from the TLA (pointing into laryngeal direction) according  
517 to the convention illustrated in Fig.8B.



## 518 **Directional/Circular Statistics**

519 Circular statistics represent a subfield of statistics dealing with data distributed on angular or  
520 circular scales. Since we are basically dealing with angles herein, it is important to note that  
521 angles are distributed on a circular scale and, thus, the designation of zero, as well as of low  
522 and high values, is arbitrary Berens (2009). As a consequence, statistical measures designed for  
523 data, which are distributed on a linear scale, can principally not be applied to data distributed  
524 on a circular scale.

### 525 **Circular Mean Value**

526 In order to calculate the circular mean  $\langle \gamma \rangle_c$  of a set of  $N$  angles:  $(\gamma_1, \gamma_2, \dots, \gamma_N)$ , each angle  $\gamma_i$   
527 was first transformed into the unit vector  $\vec{R}_i = (\cos \gamma_i, \sin \gamma_i)$ . The mean resultant vector  $\langle \vec{R} \rangle$   
528 Berens (2009) is then given as

$$\langle \vec{R} \rangle = \frac{1}{N} \sum_{i=1}^N \vec{R}_i = (\langle \cos \gamma_i \rangle, \langle \sin \gamma_i \rangle) . \quad (7)$$

529 The direction  $\langle \gamma \rangle_c$  of the mean resultant vector  $\langle \vec{R} \rangle$ , finally represents the mean direction:

$$\langle \gamma \rangle_c = \arctan 2 (\langle \sin \gamma_i \rangle, \langle \cos \gamma_i \rangle) , \quad (8)$$

530 where  $\arctan 2(x)$  denotes the 2-argument arctangent function, which is commonly used to  
531 calculate the unique inverse of the tangent, as it takes care of the necessary quadrant correc-  
532 tion. Note that in Eq.7 and Eq.8, as well as in the following, 'linear averaging' is denoted by  
533  $\langle \dots \rangle$ , whereas circular averaging is denoted by  $\langle \dots \rangle_c$ .

### 534 **Circular Standard Deviation**

535 The circular analogue to the 'linear' standard deviation can be derived from the length of  
536 the mean resultant vector  $R = ||\langle \vec{R} \rangle||$ , which lies within the interval  $[0, 1]$  and represents a  
537 measure for circular spread: the narrower the sample  $\{\gamma_i\}_{i \in \{0,1,\dots,N\}}$  is distributed around its  
538 mean direction, the closer  $R$  is to 1. As the variance is a measure for spread of values in a  
539 dataset, the circular variance  $V_c$  can be defined according to Berens (2009):  $V_c = 1 - R$ . The  
540 circular standard deviation is commonly defined as Berens (2009)

$$S_c = \sqrt{-2 \ln(R)} , \quad (9)$$

541 and corresponds to the standard deviation of the wrapped normal distribution.

542

## 543 **Experimental Procedure and Imaging Setup for the Functional Analy-** 544 **sis**

545 Fresh tracheas were obtained from the local slaughterhouse. In order to keep track of the  
546 tracheal orientation, the tracheas were removed together with the larynx. The tracheas were  
547 sealed in plastic bags and transported at temperatures below 10°C in cooling boxes. Upon  
548 arrival at the university, they were kept in the refrigerator until the measurements were per-  
549 formed (within approximately 2 hours after the slaughter). Tracheal pieces of sizes between  
550  $2 \times 2 \text{ cm}^2$  and  $5 \times 5 \text{ cm}^2$  were cut out of the trachea and mounted in a customized sample  
551 holder, which was then adequately oriented and aligned on the microscope stage. The micro-  
552 scope stage was equipped with an in-house constructed climate chamber, which allowed to  
553 take measurements at controlled environmental conditions. The temperature and air moisture  
554 were kept constant and set to 30°C and beyond 90% relative humidity, respectively. The ob-  
555 servation of the oscillating mucous surface relied on an epidark field reflectometry setup built  
556 around an upright microscope (Nikon Eclipse E600FN, Kanagawa, Japan). Structured illumi-  
557 nation (LED illumination delivering an annular hollow beam) through the objective provided  
558 adequate contrast while avoiding the direction artifacts associated with the traditional differ-  
559 ential interference contrast (DIC). Recordings were taken with the digital CCD camera Dalsa  
560 CA-D1T at an image depth of 12 bits at a frame rate of 500 Hertz. Finally, an area of approxi-  
561 mately  $140 \times 140 \mu\text{m}^2$  was captured using a 40 $\times$ -objective (Nikon Plan Fluor, NA 0.6, WD 2.7  
562 mm).

563

## 564 **Characterization of Observed Wave Fields and Mucociliary Transport**

565 In order to quantitatively characterize the observed mucociliary wave fields, we used sophis-  
566 ticated image processing methods, which were presented in great detail in Ryser et al. (2007)  
567 and subsequently used for the analysis of mucociliary phenomena on explants of the bovine  
568 fallopian tubes Schätz et al. (2013), as well as for the investigation of the mucociliary clearance

569 on trachea explants of diseased snakes Wyss et al. (2018). In the following the two morpholog-  
570 ical measurements of the ciliary orientation are compared to the direction of transport as well  
571 as to the wave propagation direction. The transport velocity was measured by tracking applied  
572 tracer particles (mushroom spores). On each captured image sequence, several particles were  
573 tracked. The mean particle velocity (measured in  $[\mu\text{m/s}]$ ) provides an adequate estimate for  
574 the flow velocity, which we denote as  $\vec{v}_{flow}$  in the following.

575 The wave propagation velocity was determined two-fold: 1) by the exploration of the  
576 space-time correlations contained in each image sequence and 2) by decomposing the image  
577 sequences as a synthesis of harmonic plane waves.

578 The first method delivers an estimate for the mean propagation of the captured surface  
579 wavelets ( $\vec{v}_{wave}$ ), by actually pursuing the temporal displacement of the mean dynamic struc-  
580 ture. This was done by determining the shifting velocity of the peak in spatio-temporal cross-  
581 correlograms. The second method is based on the generation of the spatial power spectral  
582 density, i.e. the distribution of the wave vectors ( $\vec{k}$ ), from which we determined the mean  
583 wave vector propagating into the pharyngeal direction  $\langle \vec{k}_{forward} \rangle$  and the mean wave vector  
584 propagating into the opposite direction  $\langle \vec{k}_{backward} \rangle$ .

585

## 586 References

587 K. Baumann. Development: going with the flow. *Nat. Rev. Mol. Cell Bio.*, 11(5):313, 2010. ISSN  
588 1471-0080. doi: 10.1038/nrm2891.

589 P. Berens. CircStat: A MATLAB toolbox for circular statistics. *J. Stat. Softw.*, 31(10):1–21, 2009.  
590 ISSN 19395108. doi: 10.1002/wics.10.

591 A. Burn. *Functional Imaging of Mucociliary Clearance*. PhD thesis, University of Bern, 2009.

592 X. M. Bustamante-Marin, W. N. Yin, P. R. Sears, M. E. Werner, E. J. Brotslaw, B. J. Mitchell,  
593 C. M. Jania, K. L. Zeman, T. D. Rogers, L. E. Herring, L. Refabért, L. Thomas, S. Amselem,  
594 E. Escudier, M. Legendre, B. R. Grubb, M. R. Knowles, M. A. Zariwala, and L. E. Ostrowski.

- 595 Lack of GAS2L2 Causes PCD by Impairing Cilia Orientation and Mucociliary Clearance.  
596 *Am. J. Hum. Genet.*, 104(2):229–245, 2019. ISSN 15376605. doi: 10.1016/j.ajhg.2018.12.009.
- 597 Y.-H. Chien, M. E. Werner, J. Stubbs, M. S. Joens, J. Li, S. Chien, J. A. J. Fitzpatrick, B. J. Mitchell,  
598 and C. Kintner. Bbof1 is required to maintain cilia orientation. *Development*, 140(16):3468–  
599 3477, 2013. ISSN 0950-1991. doi: 10.1242/dev.096727.
- 600 R. De Iongh and J. Rutland. Orientation of respiratory tract cilia in patients with primary  
601 ciliary dyskinesia, bronchiectasis, and in normal subjects. *J. Clin. Pathol.*, 42(6):613–619,  
602 1989. ISSN 0021-9746.
- 603 J. Elgeti and G. Gompper. Emergence of metachronal waves in cilia arrays. *Proc. Natl. Acad.*  
604 *Sci. U.S.A.*, 110:4470–4475, 2013. ISSN 1091-6490. doi: 10.1073/pnas.1218869110.
- 605 A. S. Frangakis and R. Hegerl. Noise Reduction in Electron Tomographic Reconstructions  
606 Using Nonlinear Anisotropic Diffusion. *J. Struct. Biol.*, 135(3):239–250, 2001. ISSN 10478477.  
607 doi: 10.1006/jsbi.2001.4406.
- 608 A. Ghorbani and A. Najafi. Symplectic and antiplectic waves in an array of beating cilia  
609 attached to a closed body. *Phys. Rev. E*, 95:052412, 2017. ISSN 2470-0045. doi: 10.1103/  
610 PhysRevE.95.052412.
- 611 I. R. Gibbons. The Relationship Between The Fine Structure and Direction of Beat in Gill Cilia  
612 of a Lamellibranch Mollusc. *J Biophys Biochem Cytol.*, 11(1):179–205, 1961.
- 613 B. Guirao and J.-F. Joanny. Spontaneous creation of macroscopic flow and metachronal waves  
614 in an array of cilia. *Biophys. J.*, 92(6):1900–1917, 2007. ISSN 00063495. doi: 10.1529/biophysj.  
615 106.084897.
- 616 B. Guirao, A. Meunier, S. Mortaud, A. Aguilar, J.-M. Corsi, L. Strehl, Y. Hirota, A. Des-  
617 oeuvre, C. Boutin, Y.-G. Han, Z. Mirzadeh, H. Cremer, M. Montcouquiol, K. Sawamoto,  
618 and N. Spassky. Coupling between hydrodynamic forces and planar cell polarity ori-  
619 ents mammalian motile cilia. *Nat. Cell Biol.*, 12(4):341–350, 2010. ISSN 1465-7392. doi:  
620 10.1038/ncb2040.

- 621 E. Herawati, D. Taniguchi, H. Kanoh, K. Tateishi, S. Ishihara, and S. Tsukita. Multiciliated cell  
622 basal bodies align in stereotypical patterns coordinated by the apical cytoskeleton. *J. Cell*  
623 *Biol.*, 214(5):571–586, 2016. ISSN 15408140. doi: 10.1083/jcb.201601023.
- 624 M. Jorissen and T. Willems. The secondary nature of ciliary (dis)orientation in secondary and  
625 primary ciliary dyskinesia. *Acta Oto-Laryngol.*, 124(4):527–531, 2004. ISSN 00016489. doi:  
626 10.1080/00016480410016270.
- 627 J. R. Kremer, D. N. Mastronarde, and J. R. McIntosh. Computer visualization of three-  
628 dimensional image data using IMOD. *J. Struct. Biol.*, 116(1):71–76, 1996. ISSN 1047-8477.  
629 doi: 10.1006/jsbi.1996.0013.
- 630 P. Legendre and L. Legendre. *Numerical ecology*. Elsevier Science B.V., Amsterdam, 2nd english  
631 edition, 1998.
- 632 J. S. Lucas, A. Barbato, S. A. Collins, M. Goutaki, L. Behan, D. Caudri, S. Dell, E. Eber, E. Es-  
633 cudier, R. A. Hirst, C. Hogg, M. Jorissen, P. Latzin, M. Legendre, M. W. Leigh, F. Midulla,  
634 K. G. Nielsen, H. Omran, J. F. Papon, P. Pohunek, B. Redfern, D. Rigau, B. Rindlisbacher,  
635 F. Santamaria, A. Shoemark, D. Snijders, T. Tonia, A. Titieni, W. T. Walker, C. Werner,  
636 A. Bush, and C. E. Kuehni. European Respiratory Society guidelines for the diagnosis  
637 of primary ciliary dyskinesia. *Eur. Respir. J.*, 49:1601090, 2017. ISSN 13993003. doi:  
638 10.1183/13993003.01090-2016.
- 639 W. Luo, H. Yi, J. Taylor, J. D. Li, F. Chi, N. W. Todd, X. Lin, D. Ren, and P. Chen. Cilia distribution  
640 and polarity in the epithelial lining of the mouse middle ear cavity. *Sci. Rep.*, 7:45870, 2017.  
641 ISSN 20452322. doi: 10.1038/srep45870.
- 642 W. F. Marshall and C. Kintner. Cilia orientation and the fluid mechanics of development. *Curr.*  
643 *Opin. Cell Biol.*, 20(1):48–52, 2008. ISSN 09550674. doi: 10.1016/j.ceb.2007.11.009.
- 644 M. Mathur. Spatial autocorrelation analysis in plant population : An overview. *J. Nat. Appl.*  
645 *Sci.*, 7(1):501–513, 2015.

- 646 M. Mirvis, T. Stearns, and W. James Nelson. Cilium structure, assembly, and disassembly  
647 regulated by the cytoskeleton. *Biochem. J.*, 475(14):2329–2353, 2018. ISSN 0264-6021. doi:  
648 10.1042/bcj20170453.
- 649 B. Mitchell, R. Jacobs, J. Li, S. Chien, and C. Kintner. A positive feedback mechanism governs  
650 the polarity and motion of motile cilia. *Nature*, 447(7140):97–101, 2007. ISSN 14764687. doi:  
651 10.1038/nature05771.
- 652 T. Niedermayer, B. Eckhardt, and P. Lenz. Synchronization, phase locking, and metachronal  
653 wave formation in ciliary chains. *Chaos*, 18:037128, 2008. ISSN 10541500. doi: 10.1063/1.  
654 2956984.
- 655 S. P. Quinn, M. J. Zahid, J. R. Durkin, R. J. Francis, C. W. Lo, and S. C. Chennubhotla. Automated  
656 identification of abnormal respiratory ciliary motion in nasal biopsies. *Sci. Transl. Med.*, 7  
657 (299):299ra124, 2015. doi: 10.1126/scitranslmed.aaa1233.
- 658 C. F. J. Rayner, A. Rutman, A. Dewar, M. A. Greenstone, P. J. Cole, and R. Wilson. Ciliary  
659 disorientation alone as a cause of primary ciliary dyskinesia syndrome. *Am. J. Respir. Crit.  
660 Care Med.*, 153(3):1123–1129, 1996. ISSN 1073449X. doi: 10.1164/ajrccm.153.3.8630555.
- 661 J. Ricka. Zilien: Mannschaftsspiel mit Molekularmotoren. Selbstorganisierte Selbstreinigung  
662 von Atmungswegen. *Phys. unserer Zeit*, 41(2):74–80, 2010. doi: 10.1002/piuz.201001227.
- 663 J. Rutland and R. U. De Jongh. Random Ciliary Orientation. *N. Engl. J. Med.*, 323(24):1681–1684,  
664 1993.
- 665 A. Rutman, P. Cullinan, M. Woodhead, P. J. Cole, and R. Wilson. Ciliary disorientation: A  
666 possible variant of primary ciliary dyskinesia. *Thorax*, 48(7):770–771, 1993. ISSN 00406376.  
667 doi: 10.1136/thx.48.7.770.
- 668 M. Ryser, A. Burn, T. Wessel, M. Frenz, and J. Rička. Functional imaging of mucociliary phe-  
669 nomena: High-speed digital reflection contrast microscopy. *Eur. Biophys. J.*, 37:35–54, 2007.  
670 ISSN 01757571. doi: 10.1007/s00249-007-0153-3.

- 671 P. Satir. Chirality of the cytoskeleton in the origins of cellular asymmetry. *Philos. Trans. R.*  
672 *Soc. B*, 371(1710):20150408, 2016. ISSN 0962-8436. doi: 10.1098/rstb.2015.0408.
- 673 P. Satir and S. T. Christensen. Overview of structure and function of mammalian cilia. *Annu.*  
674 *Rev. Physiol.*, 69:377–400, 2007. ISSN 0066-4278. doi: 10.1146/annurev.physiol.69.040705.  
675 141236.
- 676 P. Satir and E. R. Dirksen. *Function-structure correlations in cilia from mammalian respiratory*  
677 *tract*. Bethesda, MD: Am. Physiol. Soc., 1985. doi: 10.1002/cphy.cp030115.
- 678 P. Satir, T. Heuser, and W. S. Sale. A structural basis for how motile cilia beat. *Bioscience*, 64  
679 (12):1073–1083, 2014. ISSN 15253244. doi: 10.1093/biosci/biu180.
- 680 G. Schätz, M. Schneiter, J. Ricka, K. Kühni-Boghenbor, S. A. Tschanz, M. G. Doherr, M. Frenz,  
681 and M. H. Stoffel. Ciliary Beating Plane and Wave Propagation in the Bovine Oviduct. *Cells*  
682 *Tissues Organs*, 198:457–469, 2013. ISSN 1422-6421. doi: 10.1159/000360155.
- 683 M. Schneiter, J. Ricka, and M. Frenz. Self-Organization of Self-Clearing Beating Patterns in  
684 an Array of Locally Interacting Ciliated Cells Formulated as an Adaptive Boolean Network.  
685 *Theory Biosci.*, 2019. ISSN 1611-7530. doi: 10.1007/s12064-019-00299-x.
- 686 A. J. Shapiro, S. D. Davis, D. Polineni, M. Manion, M. Rosenfeld, S. D. Dell, M. A. Chilvers,  
687 T. W. Ferkol, M. A. Zariwala, S. D. Sagel, M. Josephson, L. Morgan, O. Yilmaz, K. N. Olivier,  
688 C. Milla, J. E. Pittman, M. L. A. Daniels, M. H. Jones, I. A. Janahi, S. M. Ware, S. J. Daniel, M. L.  
689 Cooper, L. M. Noguee, B. Anton, T. Eastvold, L. Ehrne, E. Guadagno, M. R. Knowles, M. W.  
690 Leigh, and V. Lavergne. Diagnosis of Primary Ciliary Dyskinesia. An Official American  
691 Thoracic Society Clinical Practice Guideline. *Am. J. Respir. Crit. Care Med.*, 197(12):e24–e39,  
692 2018. ISSN 1073-449X. doi: 10.1164/rccm.201805-0819ST.
- 693 N. Spassky and A. Meunier. The development and functions of multiciliated epithelia. *Nat.*  
694 *Rev. Mol. Cell Bio.*, 18(7):423–436, 2017. ISSN 14710080. doi: 10.1038/nrm.2017.21.
- 695 K. Tateishi, T. Nishida, K. Inoue, and S. Tsukita. Three-dimensional Organization of Layered  
696 Apical Cytoskeletal Networks Associated with Mouse Airway Tissue Development. *Sci.*  
697 *Rep.*, 7:43783, 2017. ISSN 20452322. doi: 10.1038/srep43783.

- 698 W. R. Tobler. A Computer Movie Simulation Urban Growth in Detroit Region. *Econ. Geogr.*,  
699 46:234–240, 1970. ISSN 0036-8075. doi: 10.1126/science.11.277.620.
- 700 E. K. Vladar and J. D. Axelrod. Dishevelled links basal body docking and orientation in ciliated  
701 epithelial cells. *Trends Cell Biol.*, 18(11):517–520, 2008. ISSN 09628924. doi: 10.1016/j.tcb.  
702 2008.08.004.
- 703 E. K. Vladar, R. D. Bayly, A. M. Sangoram, M. P. Scott, and J. D. Axelrod. Microtubules enable  
704 the planar cell polarity of airway cilia. *Curr. Biol.*, 22(23):2203–2212, 2012. ISSN 09609822.  
705 doi: 10.1016/j.cub.2012.09.046.
- 706 E. K. Vladar, Y. L. Lee, T. Stearns, and J. D. Axelrod. Observing planar cell polarity in multicil-  
707 iated mouse airway epithelial cells. *Methods Cell Biol.*, 127:37 – 54, 2015. ISSN 0091-679X.  
708 doi: 10.1016/bs.mcb.2015.01.016.
- 709 J. B. Wallingford. Planar cell polarity signaling, cilia and polarized ciliary beating. *Curr. Opin.*  
710 *Cell Biol.*, 22(5):597–604, 2010. ISSN 09550674. doi: 10.1016/j.ceb.2010.07.011.
- 711 J. Walton. Lead Aspartate, an en Bloc Contrast Stain Particularly Useful for Ultrastructural  
712 Enzymology. *J. Histochem. Cytochem.*, 27(10):1337–1342, 1979. ISSN 0022-1554. doi: 10.  
713 1177/27.10.512319.
- 714 M. E. Werner and B. J. Mitchell. Planar cell polarity: Microtubules make the connection with  
715 cilia. *Curr. Biol.*, 22(23):R1001–R1004, 2012. ISSN 09609822. doi: 10.1016/j.cub.2012.10.030.
- 716 M. E. Werner, P. Hwang, F. Huisman, P. Taborek, C. C. Yu, and B. J. Mitchell. Actin and  
717 microtubules drive differential aspects of planar cell polarity in multiciliated cells. *J. Cell*  
718 *Biol.*, 195(1):19–26, 2011. ISSN 00219525. doi: 10.1083/jcb.201106110.
- 719 F. Wyss, M. Schneiter, U. Hetzel, S. Keller, M. Frenz, J. Ricka, and J.-M. Hatt. Investigation  
720 of the Tracheal Mucociliary Clearance in Snakes With and Without Boid Inclusion Body  
721 Disease and Lung Pathology. *J. Zoo Wildl. Med.*, 49(1):223–226, mar 2018. ISSN 1042-7260.  
722 doi: 10.1638/2016-0288R1.1.



## 723 **Acknowledgments**

724 We would like to thank our former collaborators, Manuel Ryser and Andreas Burn, for the  
725 research they performed on mucociliary transport. This work was supported by the Swiss  
726 National Science Foundation (grant #163761 to B.Z.). Microscopy was performed on equipment  
727 supported by the Microscopy Imaging Center (MIC), University of Bern, Switzerland.

## 728 **Author Contributions**

729 Martin Schneiter: conceptualization, data curation, formal analysis, investigation, methodol-  
730 ogy, software, writing - original draft and writing - review & editing; Sebastian Halm: concep-  
731 tualization, data curation, investigation, methodology, resources and writing - original draft;  
732 Adolfo Odriozola: data curation, investigation, methodology and resources; Helga Mogel: in-  
733 vestigation, methodology and resources; Jaroslav Rička: conceptualization, methodology and  
734 supervision; Michael H. Stoffel: conceptualization, investigation, methodology, project admin-  
735 istration, resources, supervision and writing - review & editing; Benoît Zuber: conceptualiza-  
736 tion, data curation, funding acquisition, investigation, methodology, project administration,  
737 resources, supervision and writing - review & editing; Martin Frenz: conceptualization, in-  
738 vestigation, methodology, project administration, resources, supervision and writing - review  
739 & editing; Stefan A. Tschanz: conceptualization, data curation, investigation, methodology,  
740 project administration, supervision, writing - review & editing

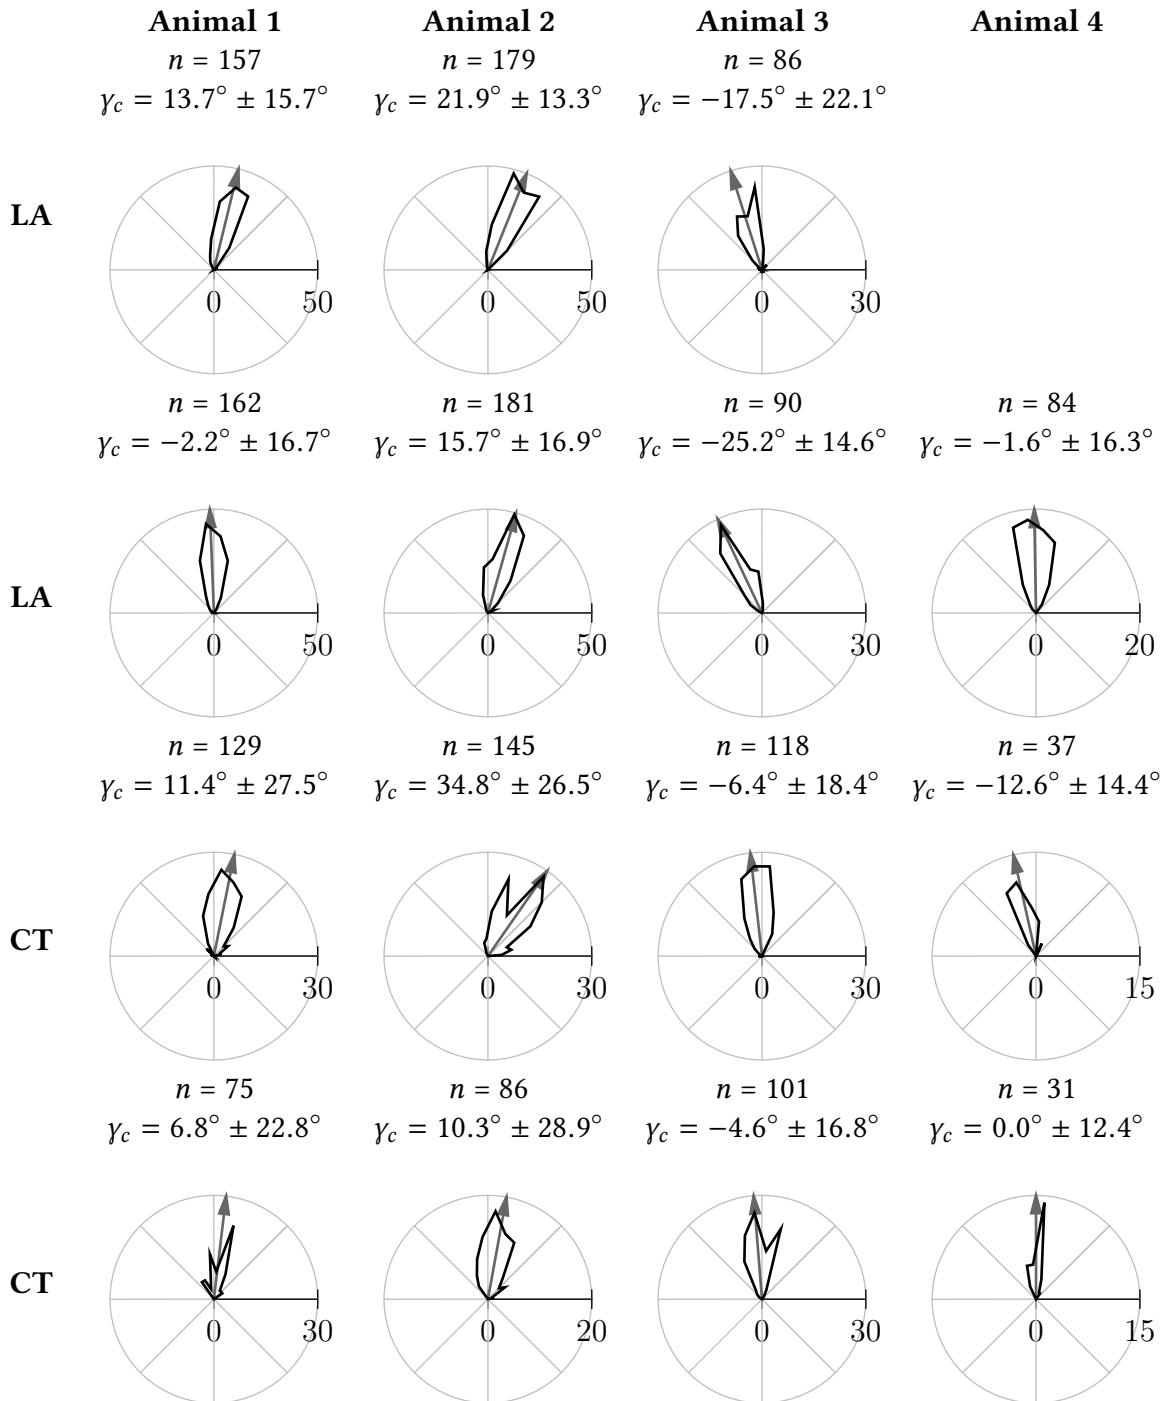

Table 1 – Figure Supplement 1: Each polar histogram (black curve) illustrates the distribution of the ciliary power stroke directions as inferred from the basal body orientation in a field of view. The arrow indicates the circular mean direction. The histograms were created by using a bin width of  $10^\circ$ .

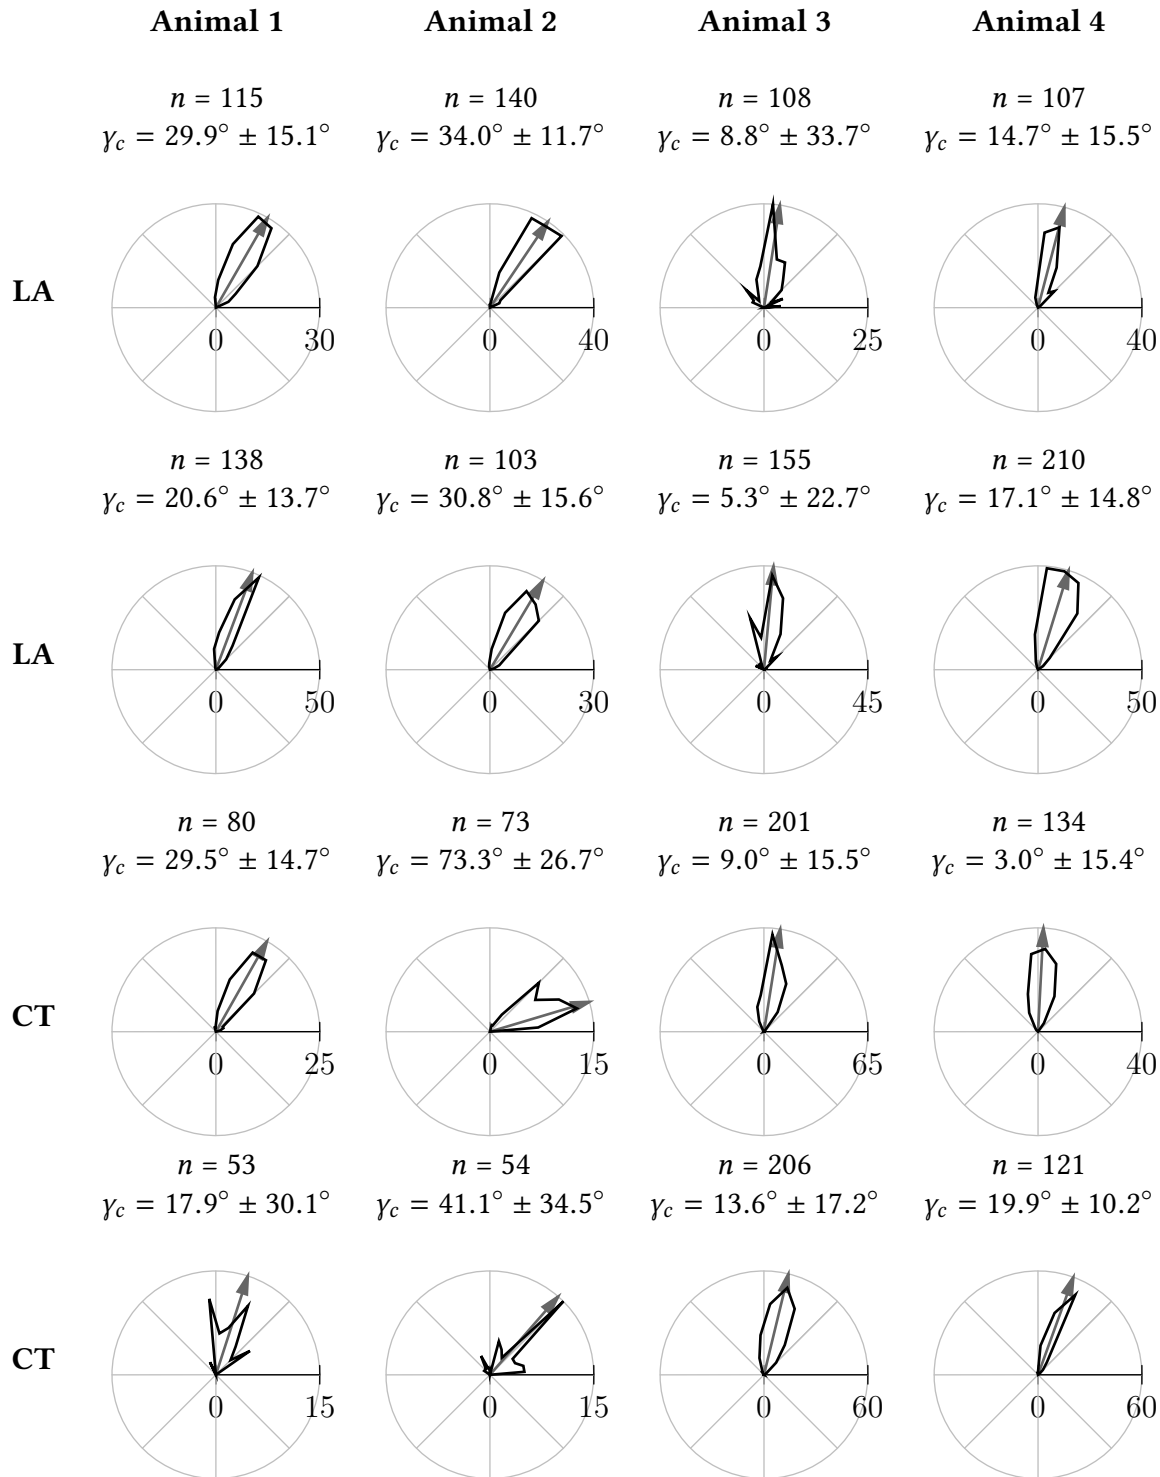

Table 2 – Figure Supplement 1: Each polar histogram (black curve) illustrates the distribution of the ciliary power stroke directions as inferred from the axonemal orientation in a field of view. The arrow indicates the circular mean direction. The histograms were created by using a bin width of  $10^\circ$ .

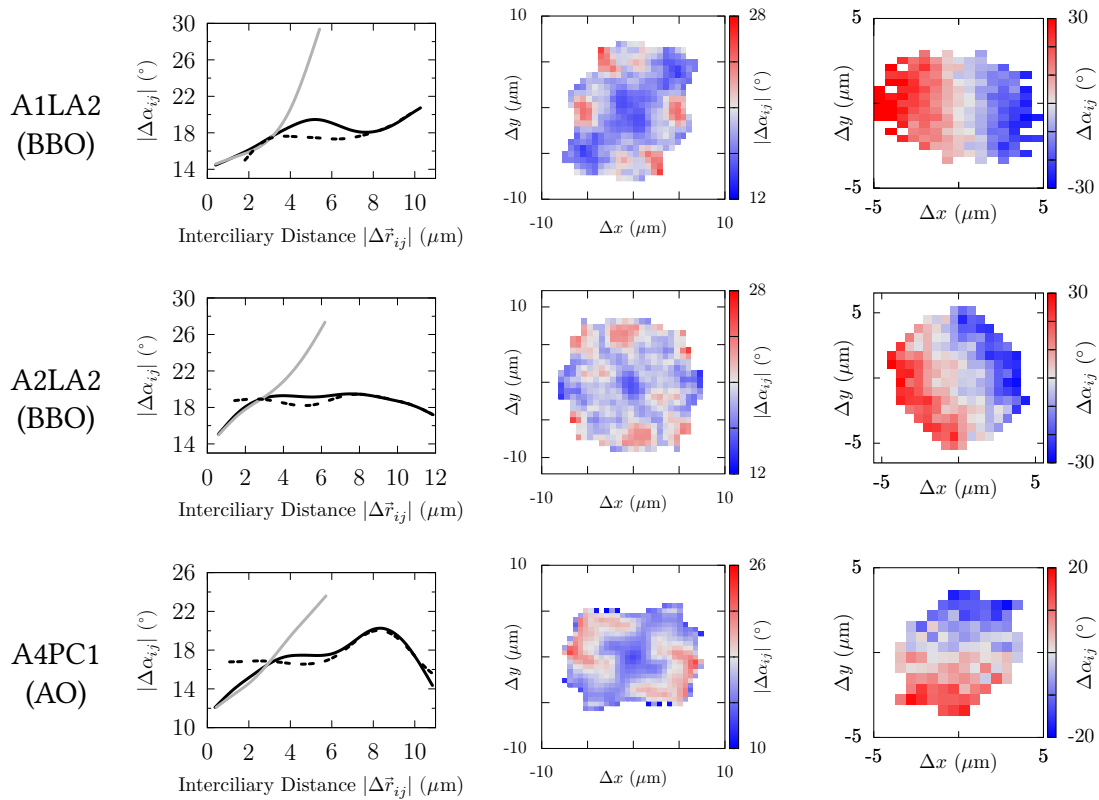

Figure 6 – Figure Supplement 1: Left panels: radial variograms (intra-FOV: solid black, intracellular: solid gray, intercellular: dashed black). Middle panels: absolute directional FOV-variograms. Right panels: signed directional intracellular variograms.

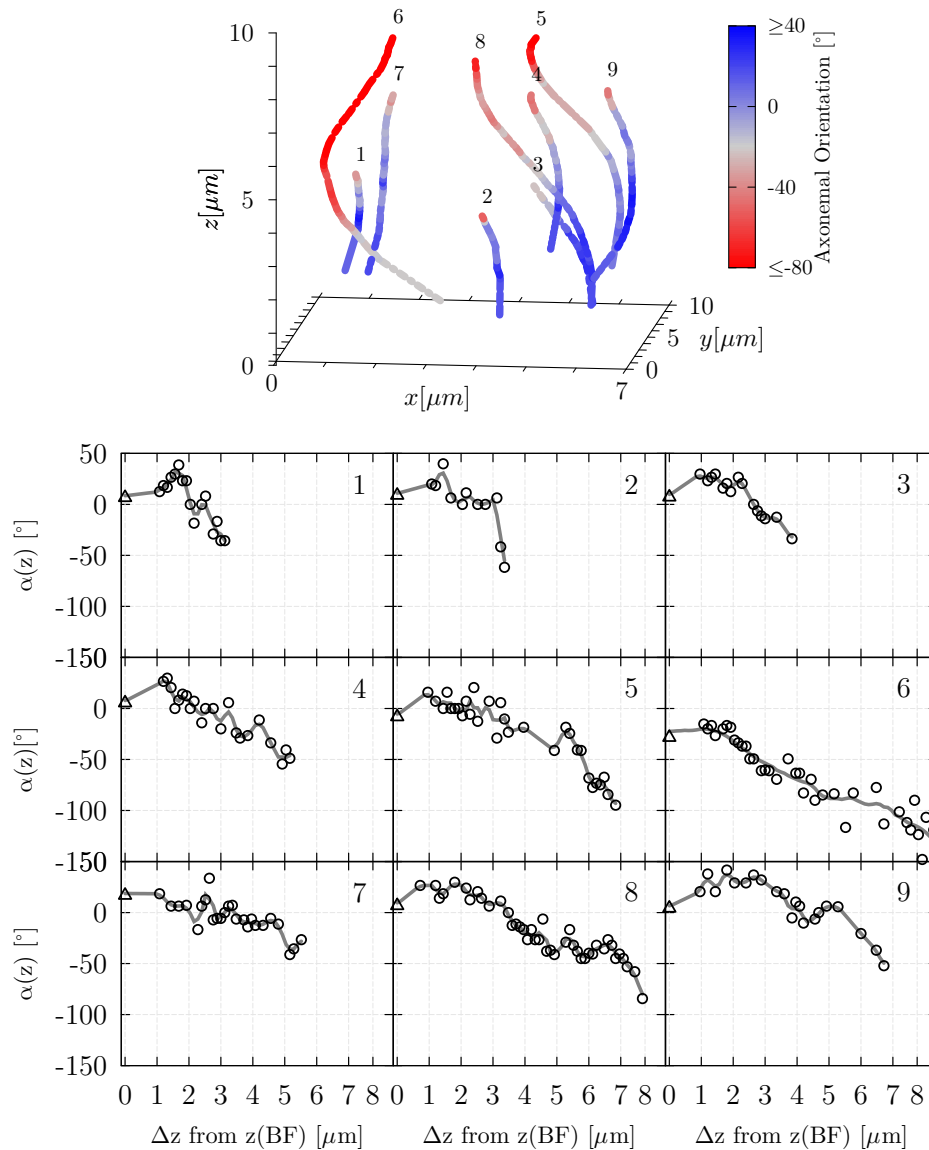

Figure 7 – Figure Supplement 1: The graphs illustrate the variation of the effective stroke direction along the ciliary long axis ( $z$ -axis) for nine cilia derived from the same sample (A1LA2). The (quasi) three-dimensional graph at the top illustrates the (right-handed) ciliary twist along the ciliary long axis. The lower graph presents the angular measurements of cilium 1-9 illustrated at the top (triangles correspond to BBO-inferred values and circles to AO-inferred values). The abscissa indicates the vertical distance from the cutting plane in which the basal foot orientation was measured. The grey line results from interpolating and slightly smoothing the data sets. As it can be seen, the effective stroke direction as inferred from the axonemal orientation varies considerably along the ciliary long axis. Therefore, great care was especially taken in order to measure the axonemal orientation as close as possible to the apical cell surface.
